# Supplementary material for: Oxazolomycins produced by Streptomyces glaucus and their cytotoxic activity
Source: Royal Society of Chemistry journal article supplement (doi:10.1039/d1ra06182h), 2021-01-01
Supplement: d1ra06182h1.pdf [file d1ra06182h1.pdf]

## Supplementary Materials

### **Oxazolomycins produced by *Streptomyces glaucus* and their cytotoxic activity**

Yu Mu<sup>a,1</sup>, Yi Jiang<sup>b,1,\*</sup>, Xiaodan Qu<sup>a</sup>, Bo Liu<sup>a</sup>, Junfeng Tan<sup>a</sup>, Guiding Li<sup>b</sup>, Mingguo Jiang<sup>c,\*</sup>, Liya Li<sup>a</sup>, Li Han<sup>a</sup>, Xueshi Huang<sup>a,\*</sup>

<sup>a</sup>*Institute of Microbial Pharmaceuticals, College of Life and Health Sciences, Northeastern University, Shenyang 110819, China*

<sup>b</sup>*Yunnan Institute of Microbiology, Yunnan University, Kunming 650091, China*

<sup>c</sup>*Guangxi Key Laboratory for Polysaccharide Materials and Modifications, School of Marine Sciences and Biotechnology, Guangxi University for Nationalities, Nanning 530008, China*

\*Corresponding authors

Tel: 86-871-65034073. Fax: 86-871-65173878. E-mail: jiangyi@ynu.edu.cn (Y. Jiang);

Tel: 86-24-83656106. Fax: 86-24-83656106. E-mail: huangxs@mail.neu.edu.cn (X. Huang);

Tel: 86-771-3267023. Fax: 86-771-3267023. E-mail: mzyjiang@gxun.edu.cn (M. Jiang)

<sup>1</sup>These authors contributed equally to this work.

Figure S1. HRESIMS spectrum of the new compound **1**

Figure S2.  $^1\text{H}$  NMR (600 MHz,  $\text{DMSO-}d_6$ ) spectrum of the new compound **1**

Figure S3.  $^{13}\text{C}$  NMR (150 MHz,  $\text{DMSO-}d_6$ ) spectrum of the new compound **1**

Figure S4. COSY spectrum of the new compound **1**

Figure S5. HSQC spectrum of the new compound **1**

Figure S6. HMBC spectrum of the new compound **1**

Figure S7. NOESY spectrum of the new compound **1**

Figure S8. HRESIMS spectrum of the new compound **2**

Figure S9.  $^1\text{H}$  NMR (600 MHz,  $\text{DMSO-}d_6$ ) spectrum of the new compound **2**

Figure S10.  $^{13}\text{C}$  NMR (150 MHz,  $\text{DMSO-}d_6$ ) spectrum of the new compound **2**

Figure S11. COSY spectrum of the new compound **2**

Figure S12. HSQC spectrum of the new compound **2**

Figure S13. HMBC spectrum of the new compound **2**

Figure S14. NOESY spectrum of the new compound **2**

Figure S15. HRESIMS spectrum of the new compound **3**

Figure S16.  $^1\text{H}$  NMR (600 MHz,  $\text{DMSO-}d_6$ ) spectrum of the new compound **3**

Figure S17.  $^{13}\text{C}$  NMR (150 MHz,  $\text{DMSO-}d_6$ ) spectrum of the new compound **3**

Figure S18. COSY spectrum of the new compound **3**

Figure S19. HSQC spectrum of the new compound **3**

Figure S20. HMBC spectrum of the new compound **3**

Figure S21. HRESIMS spectrum of the new compound **6**

Figure S22.  $^1\text{H}$  NMR (600 MHz,  $\text{CD}_3\text{OD}$ ) spectrum of the new compound **6**

Figure S23.  $^{13}\text{C}$  NMR (150 MHz,  $\text{CD}_3\text{OD}$ ) spectrum of the new compound **6**

Figure S24. COSY spectrum of the new compound **6**

Figure S25. HSQC spectrum of the new compound **6**

Figure S26. HMBC spectrum of the new compound **6**

Figure S27. NOESY spectrum of the new compound **6**

Figure S28.  $^1\text{H}$  NMR (600 MHz,  $\text{DMSO-}d_6$ ) spectrum of the known compound **4**

Figure S29.  $^{13}\text{C}$  NMR (150 MHz,  $\text{DMSO-}d_6$ ) spectrum of the known compound **4**

Figure S30.  $^1\text{H}$  NMR (600 MHz,  $\text{DMSO-}d_6$ ) spectrum of the known compound **5**

Figure S31.  $^{13}\text{C}$  NMR (150 MHz,  $\text{DMSO-}d_6$ ) spectrum of the known compound **5**

## User Spectra

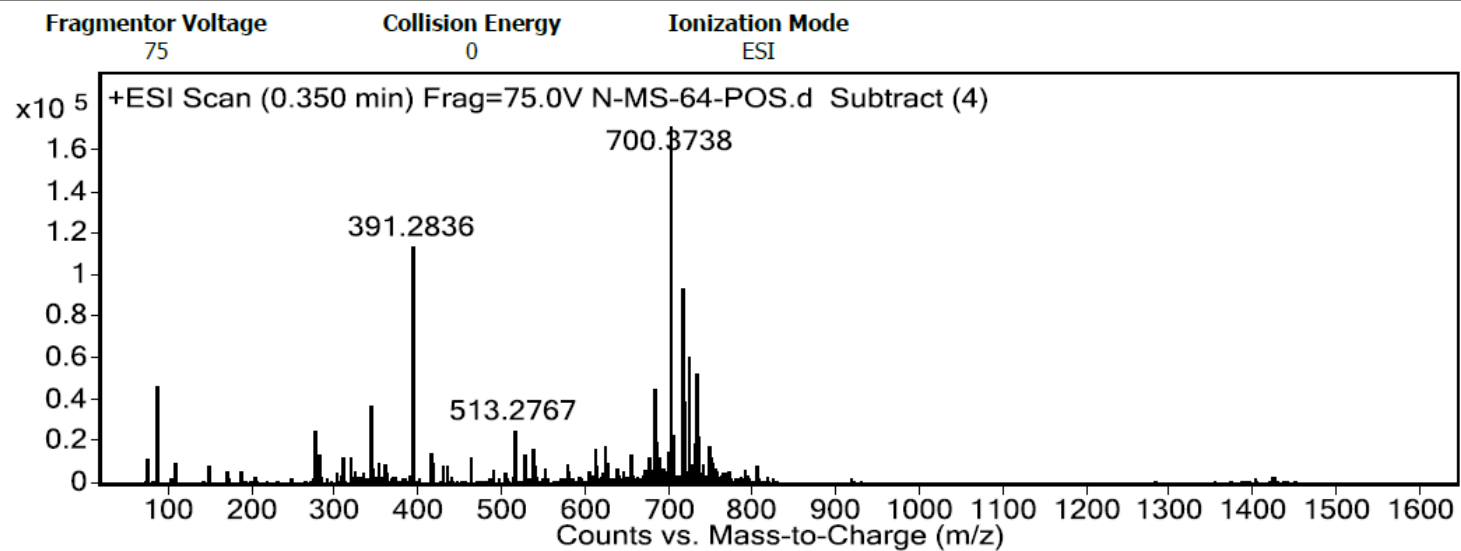

Figure S1. HRESIMS spectrum of the new compound **1**

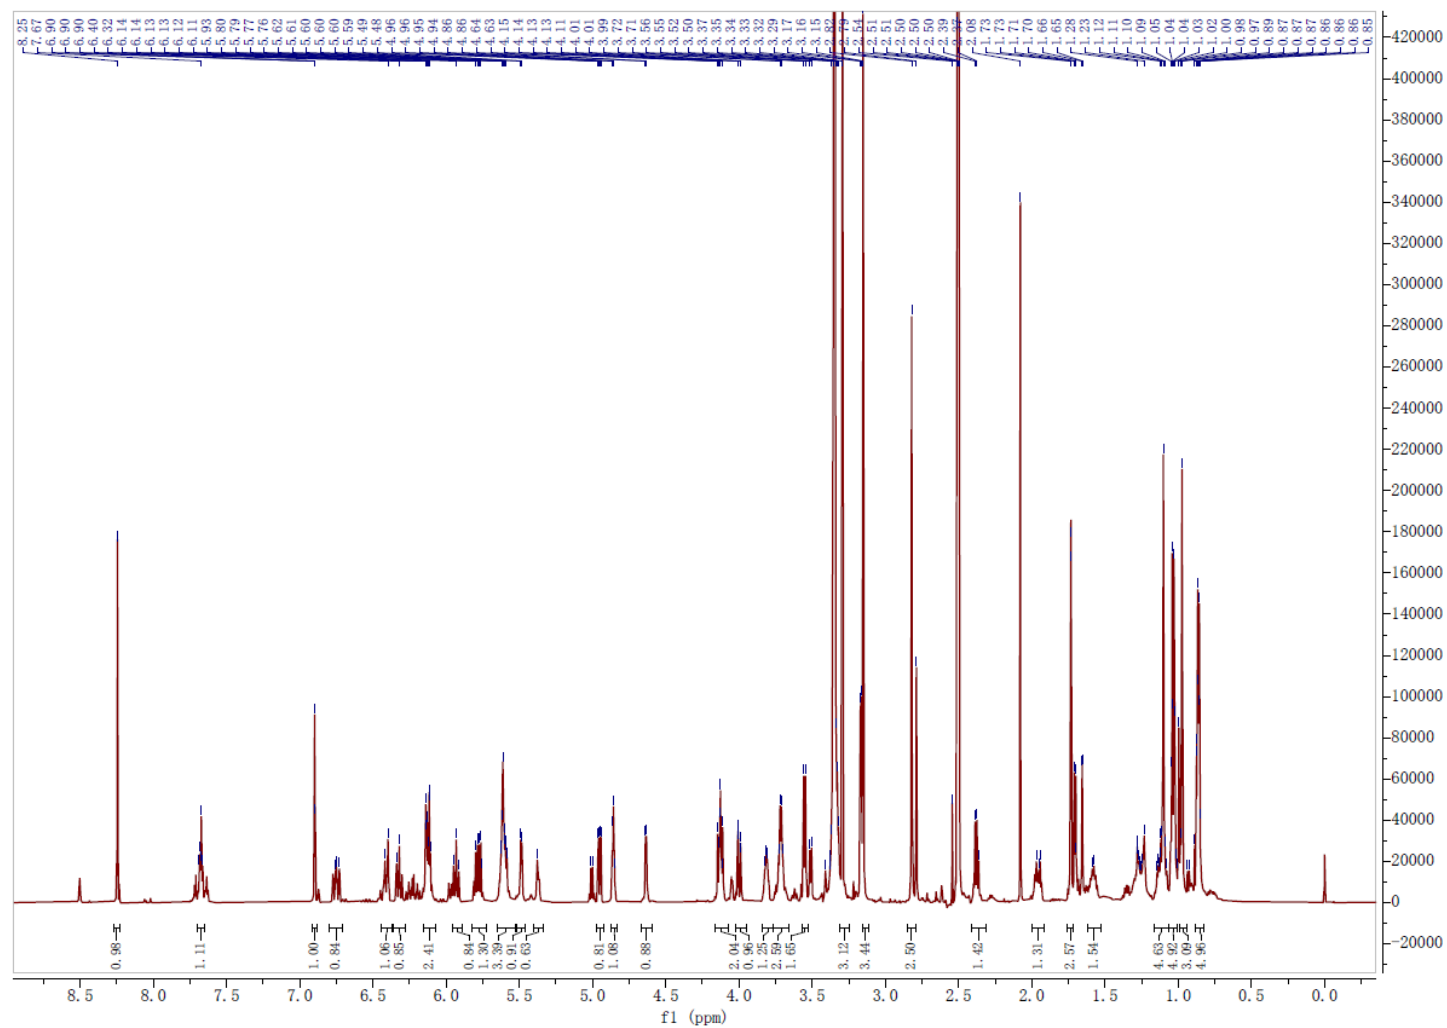

Figure S2.  $^1\text{H}$  NMR (600 MHz,  $\text{DMSO}-d_6$ ) spectrum of the new compound **1**

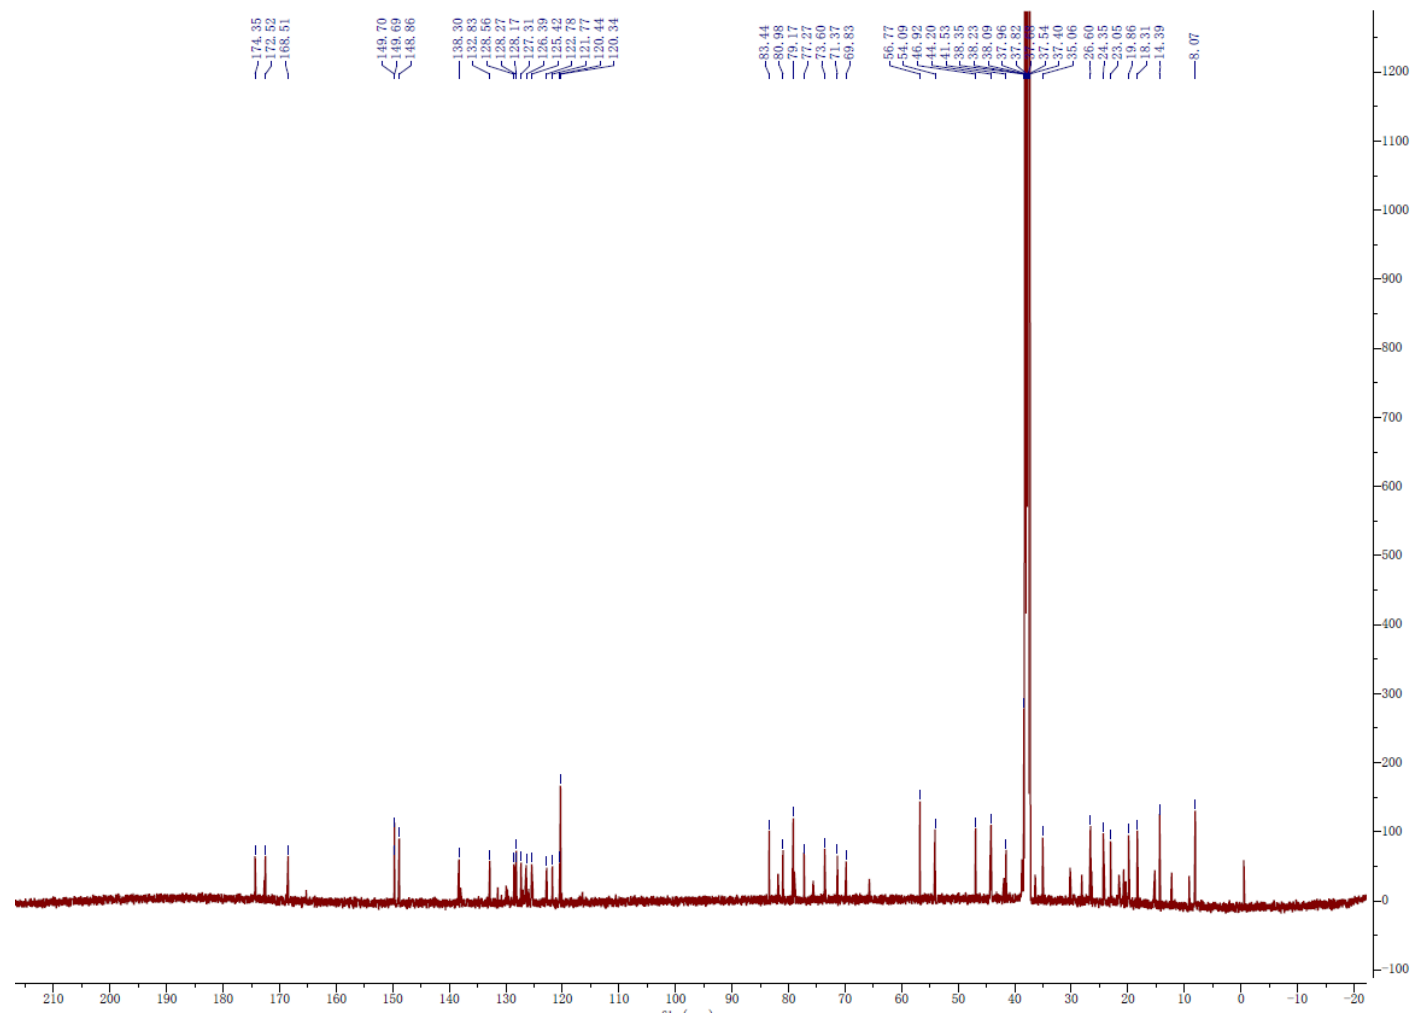

Figure S3.  $^{13}\text{C}$  NMR (150 MHz,  $\text{DMSO-}d_6$ ) spectrum of the new compound **1**

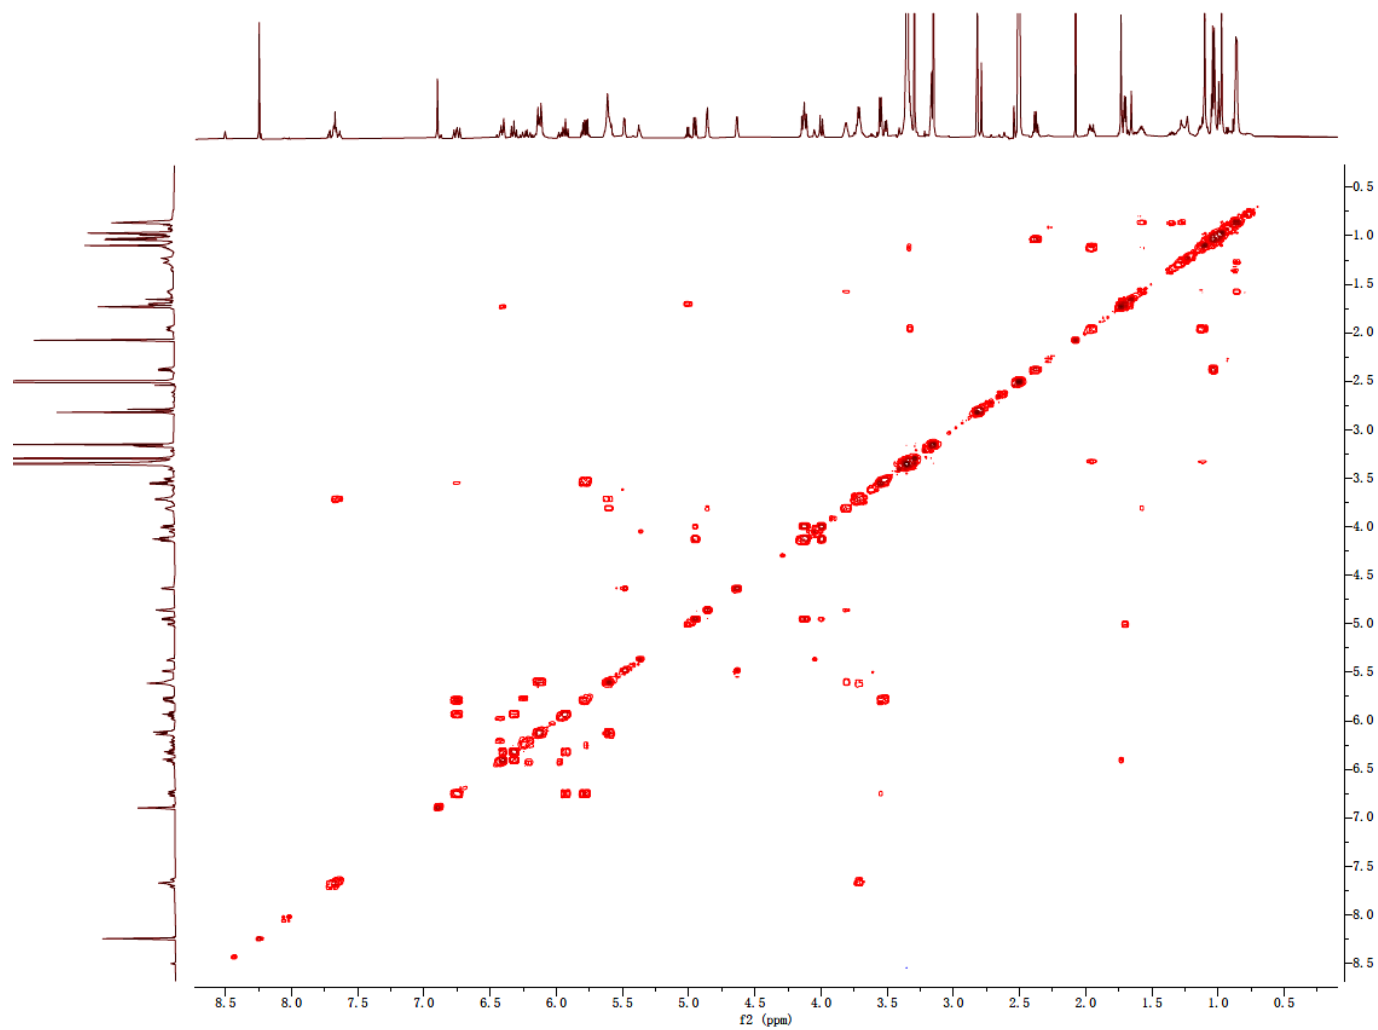

Figure S4. COSY spectrum (DMSO- $d_6$ ) of the new compound **1**

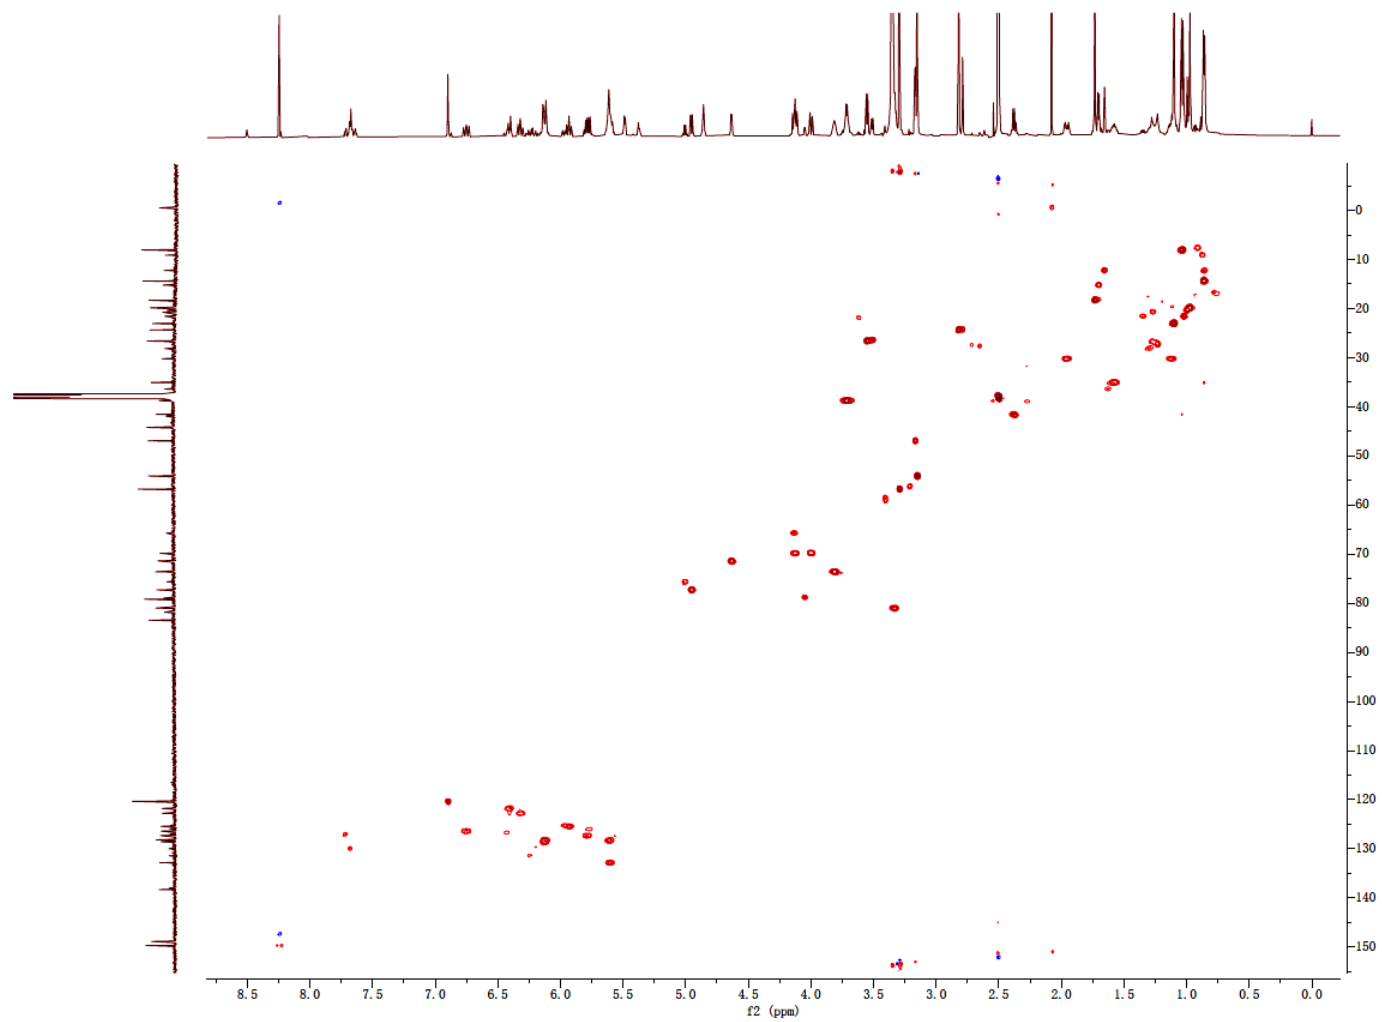

Figure S5. HSQC spectrum (DMSO- $d_6$ ) of the new compound **1**



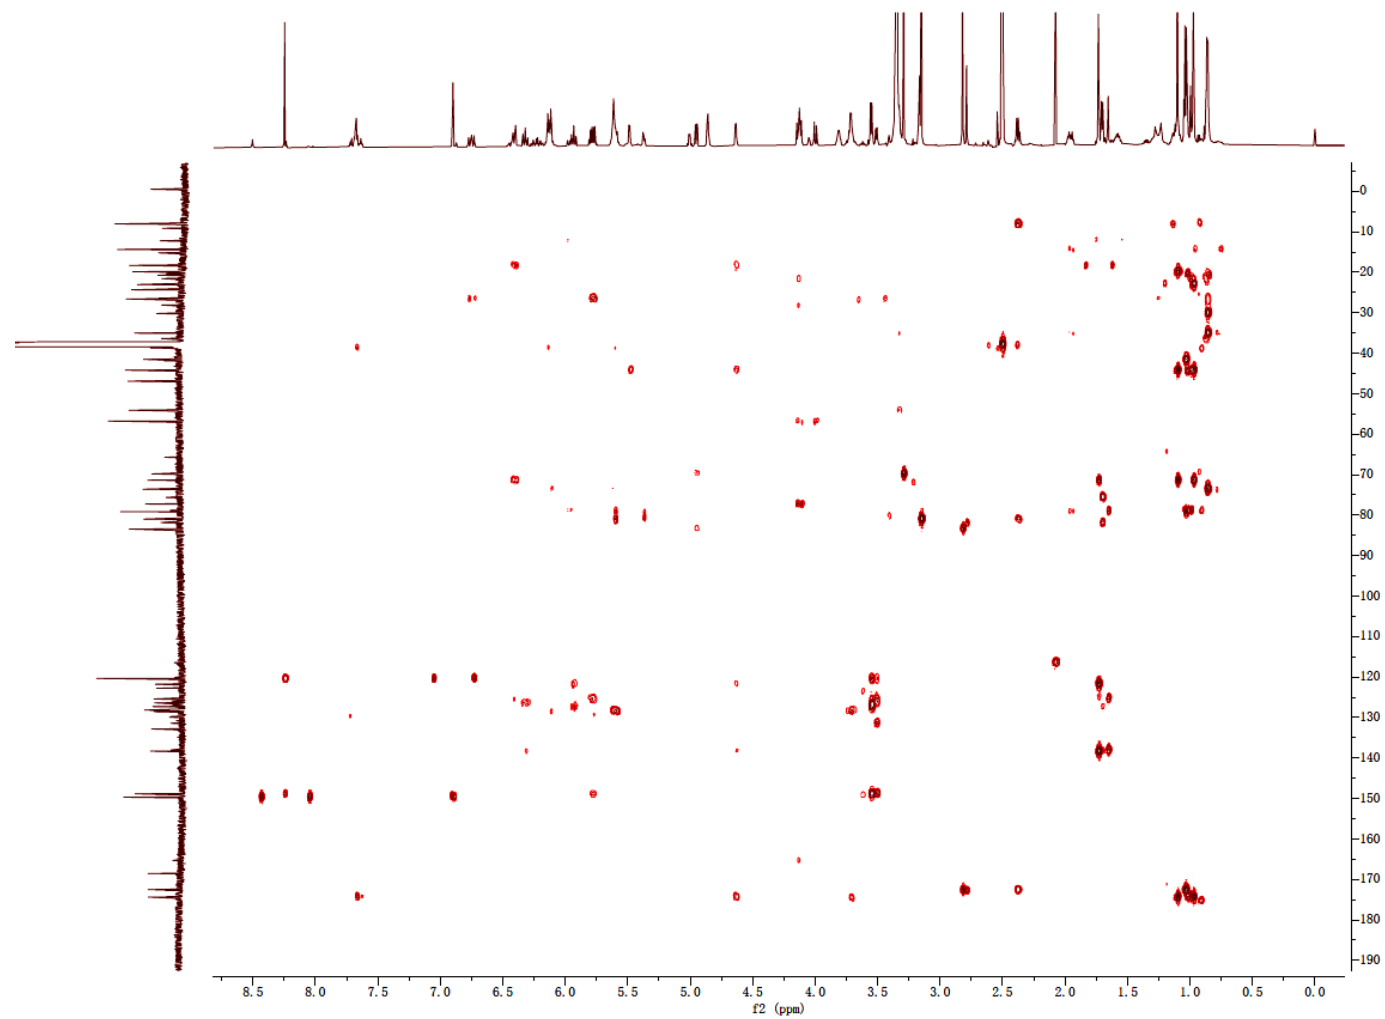

Figure S6. HMBC spectrum (DMSO- $d_6$ ) of the new compound **1**

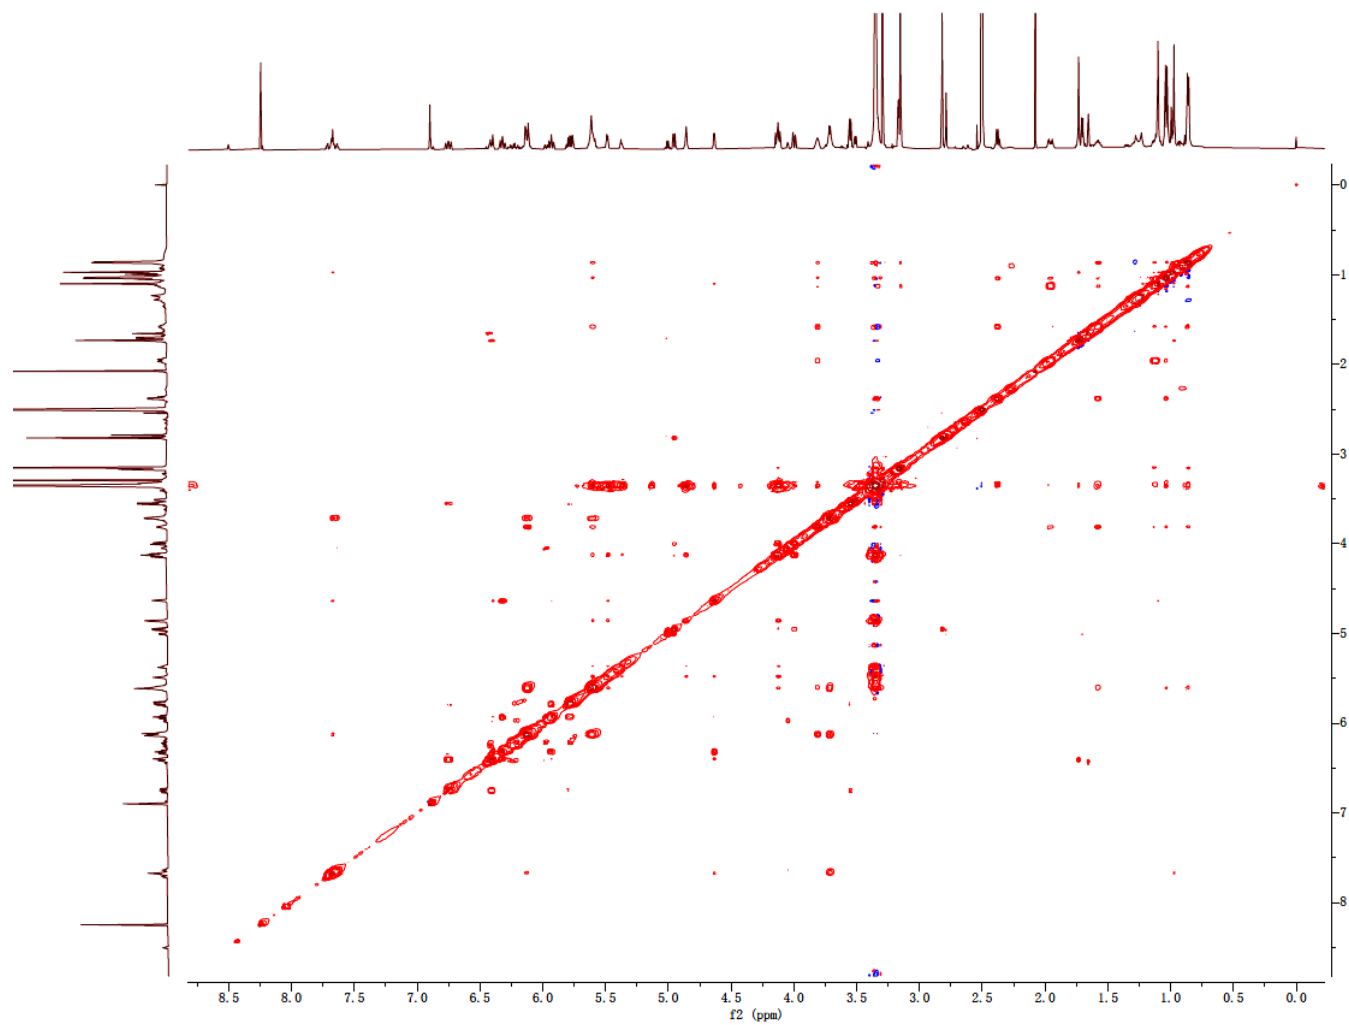

Figure S7. NOESY spectrum (DMSO- $d_6$ ) of the new compound **1**

## User Spectra

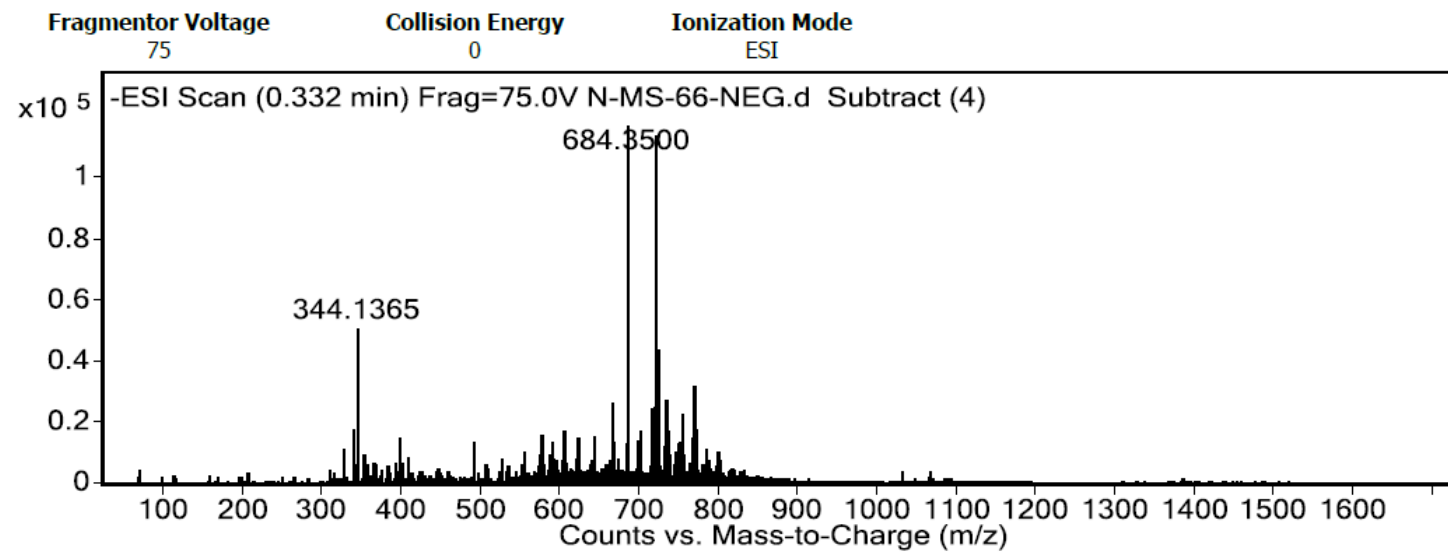

Figure S8. HRESIMS spectrum of the new compound **2**

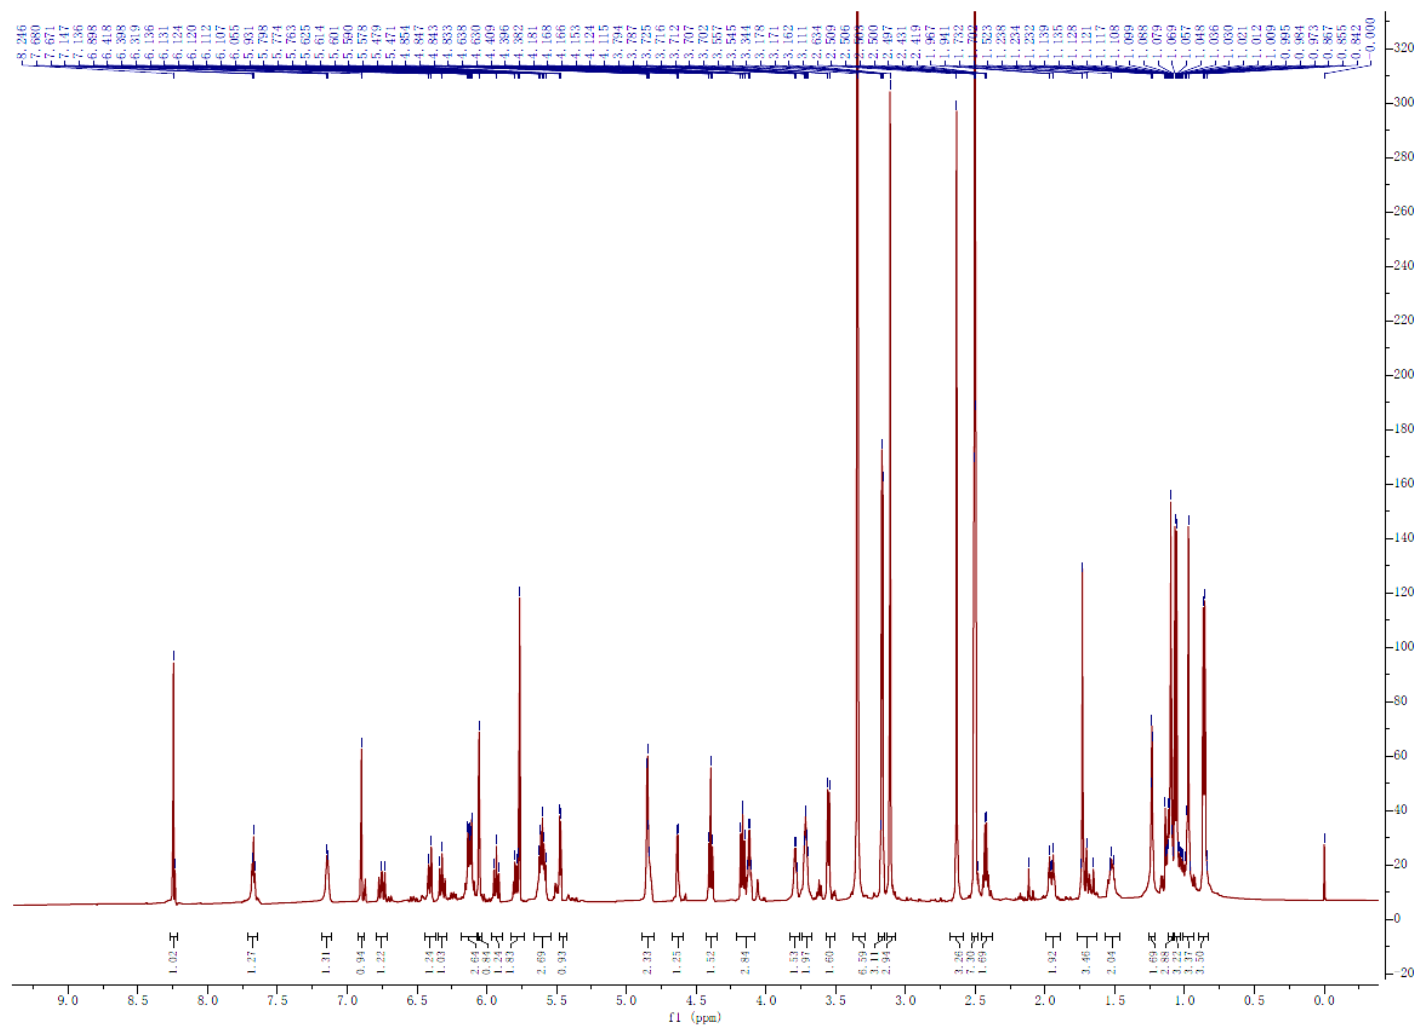

Figure S9.  $^1\text{H}$  NMR (600 MHz,  $\text{DMSO}-d_6$ ) spectrum of the new compound **2**

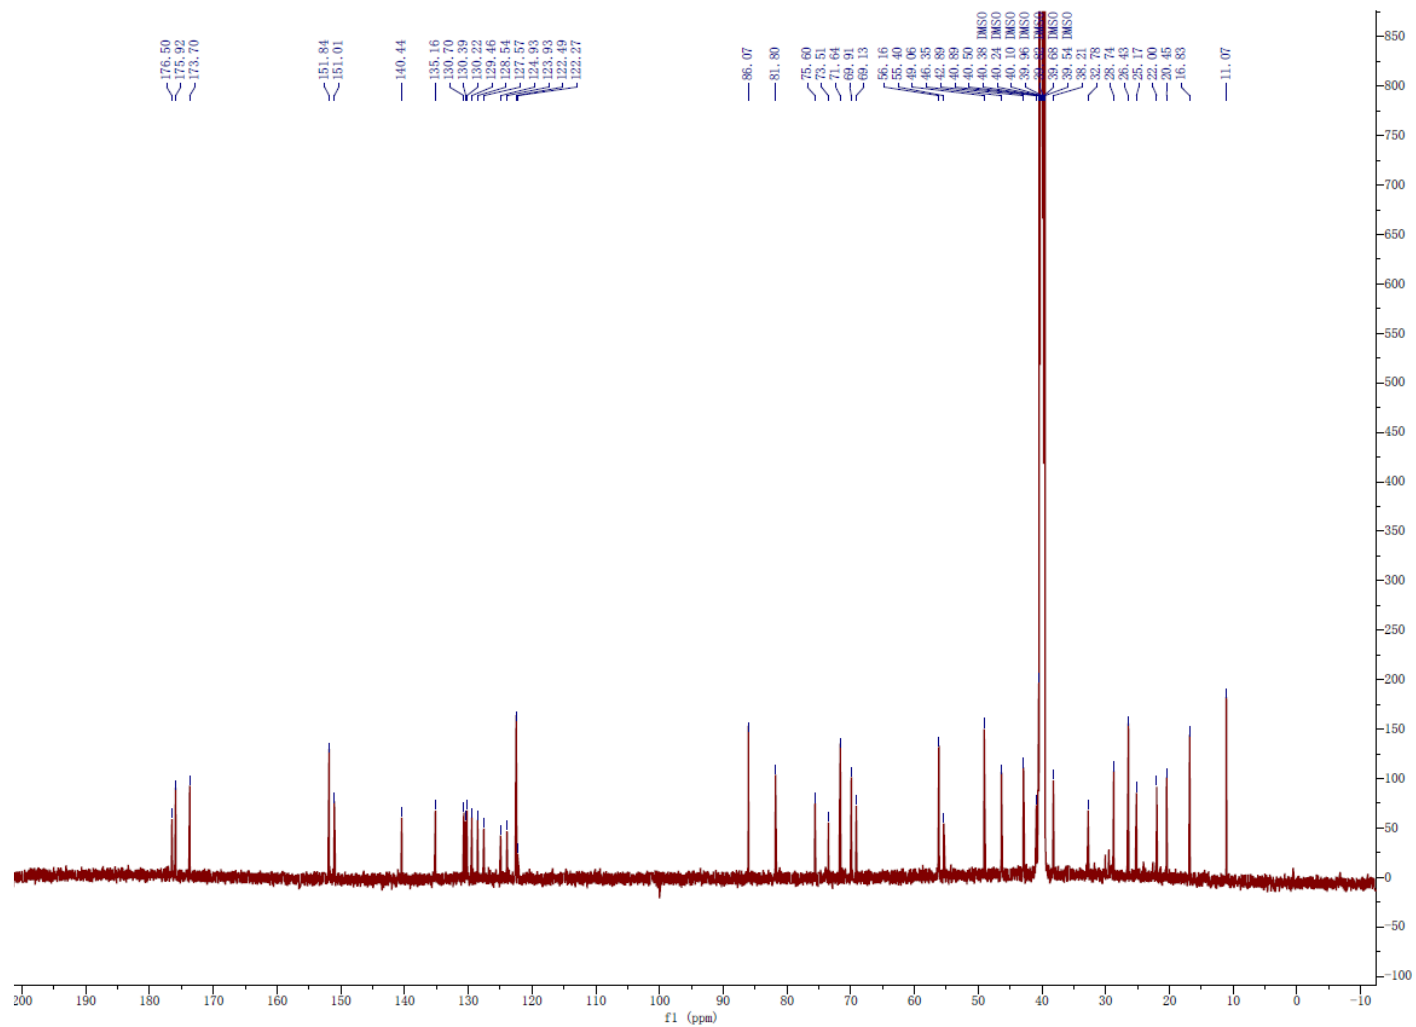

Figure S10.  $^{13}\text{C}$  NMR (150 MHz,  $\text{DMSO-}d_6$ ) spectrum of the new compound **2**

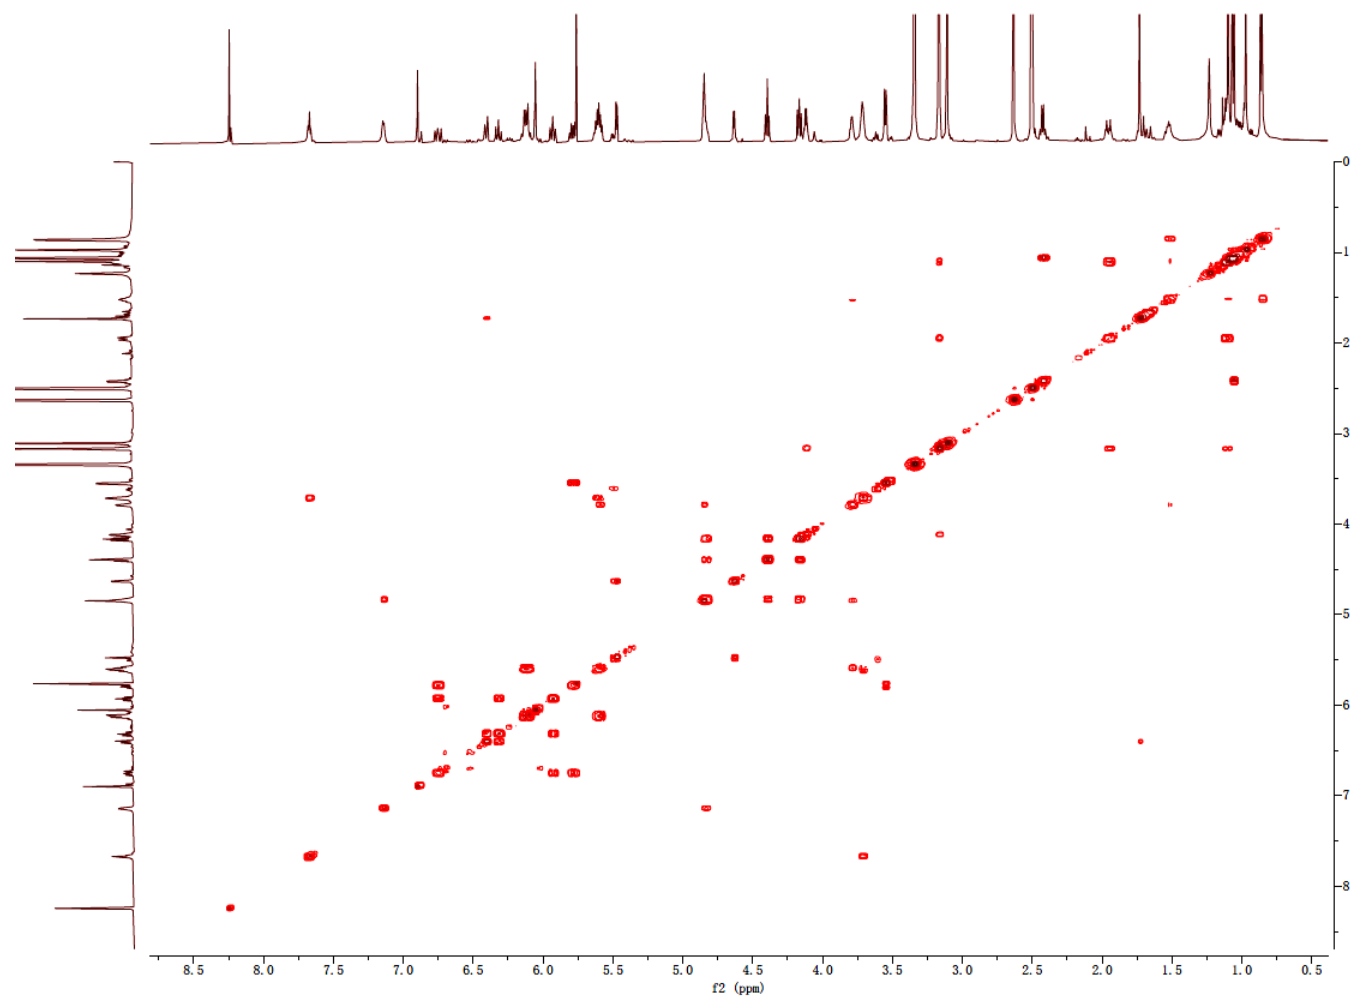

Figure S11. COSY spectrum of the new compound **2**

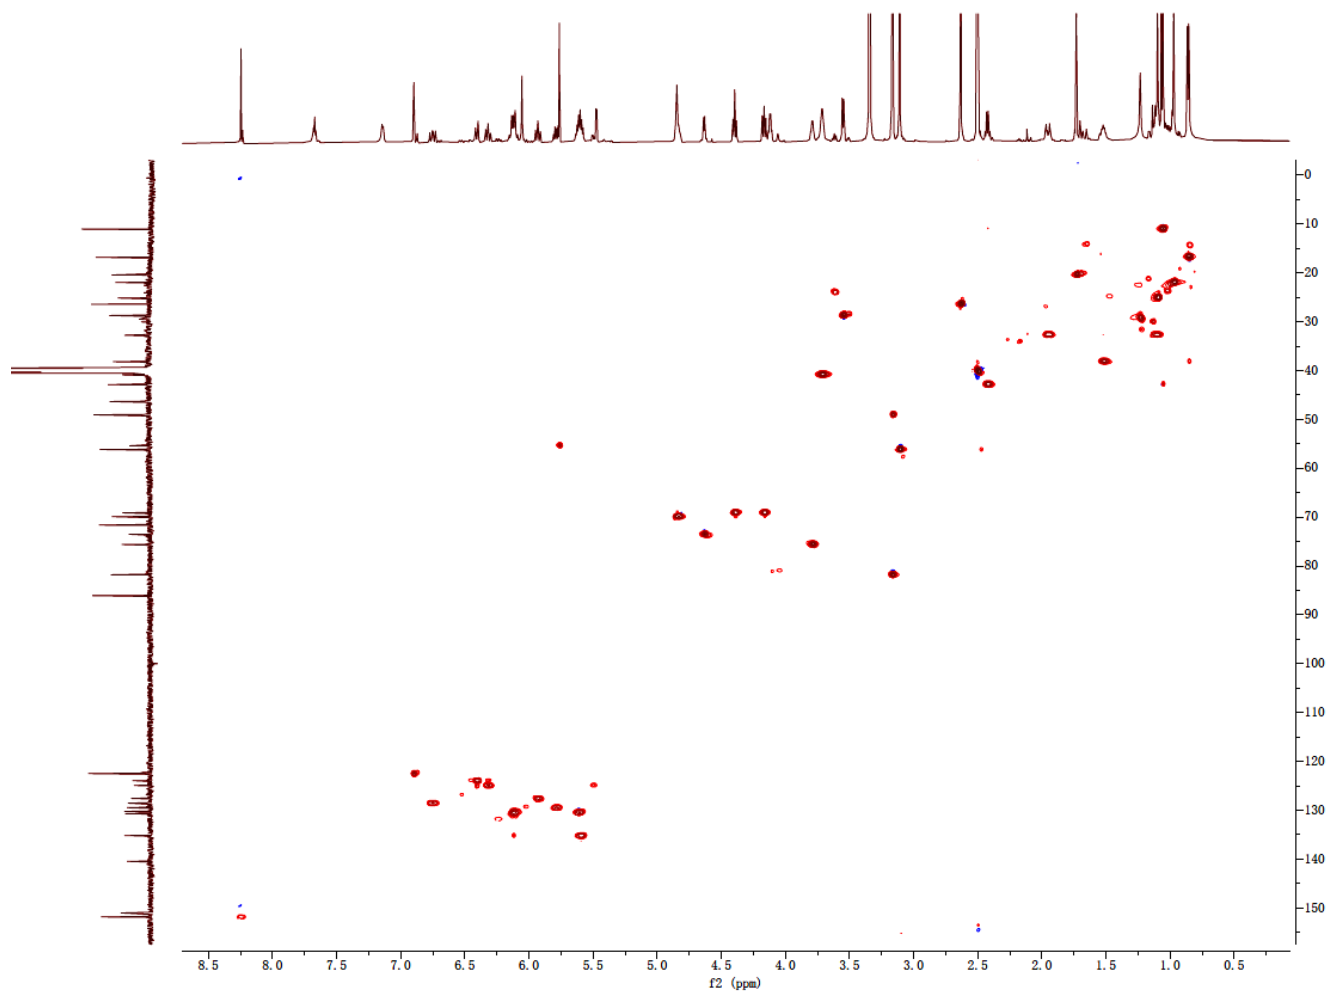

Figure S12. HSQC spectrum of the new compound **2**

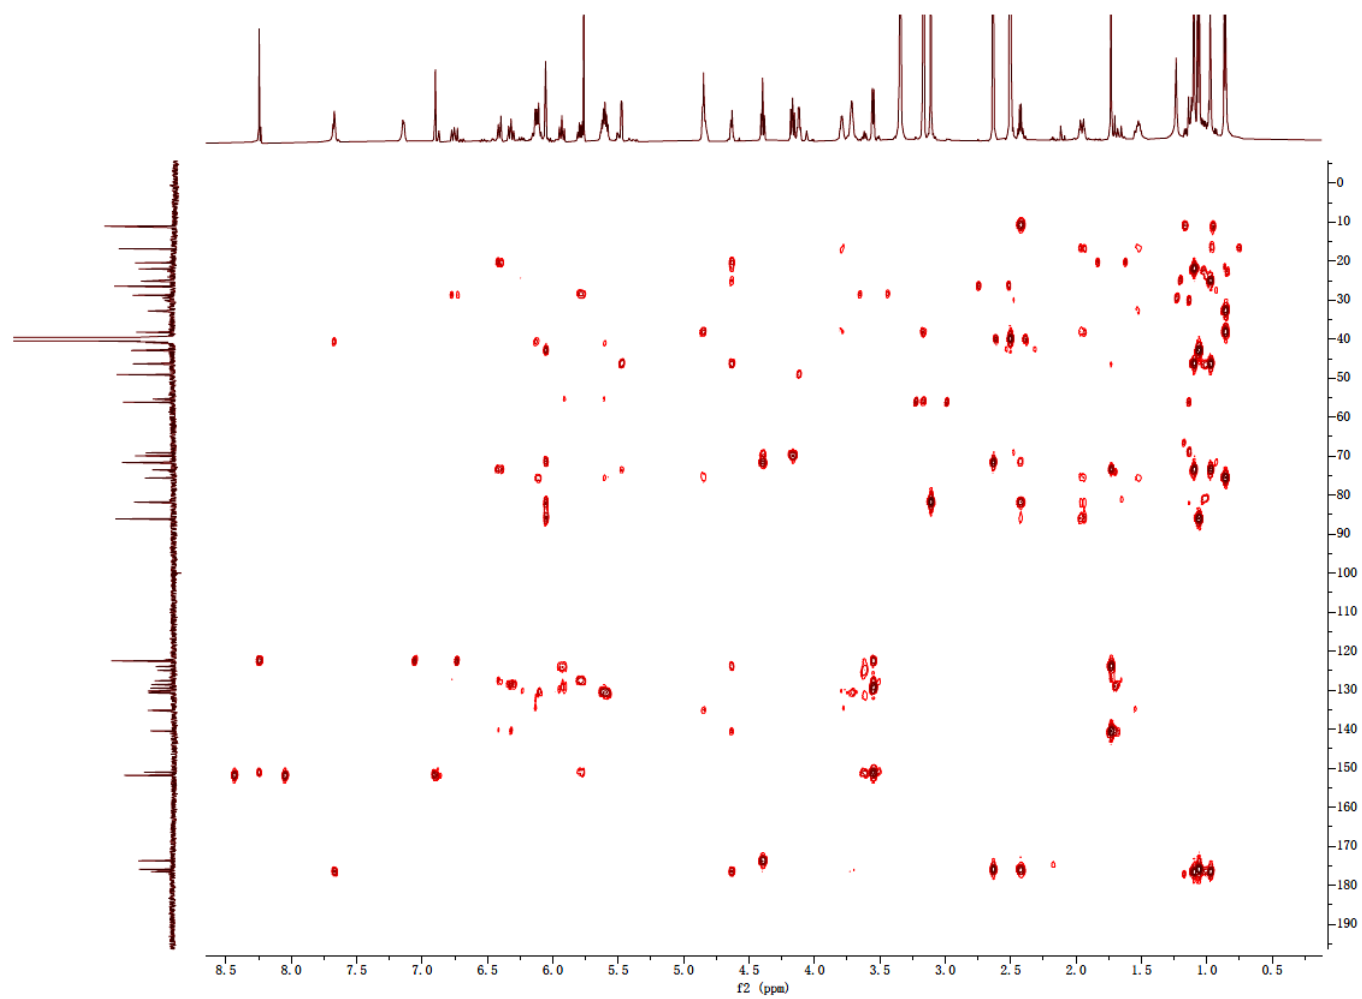

Figure S13. HMBC spectrum of the new compound **2**



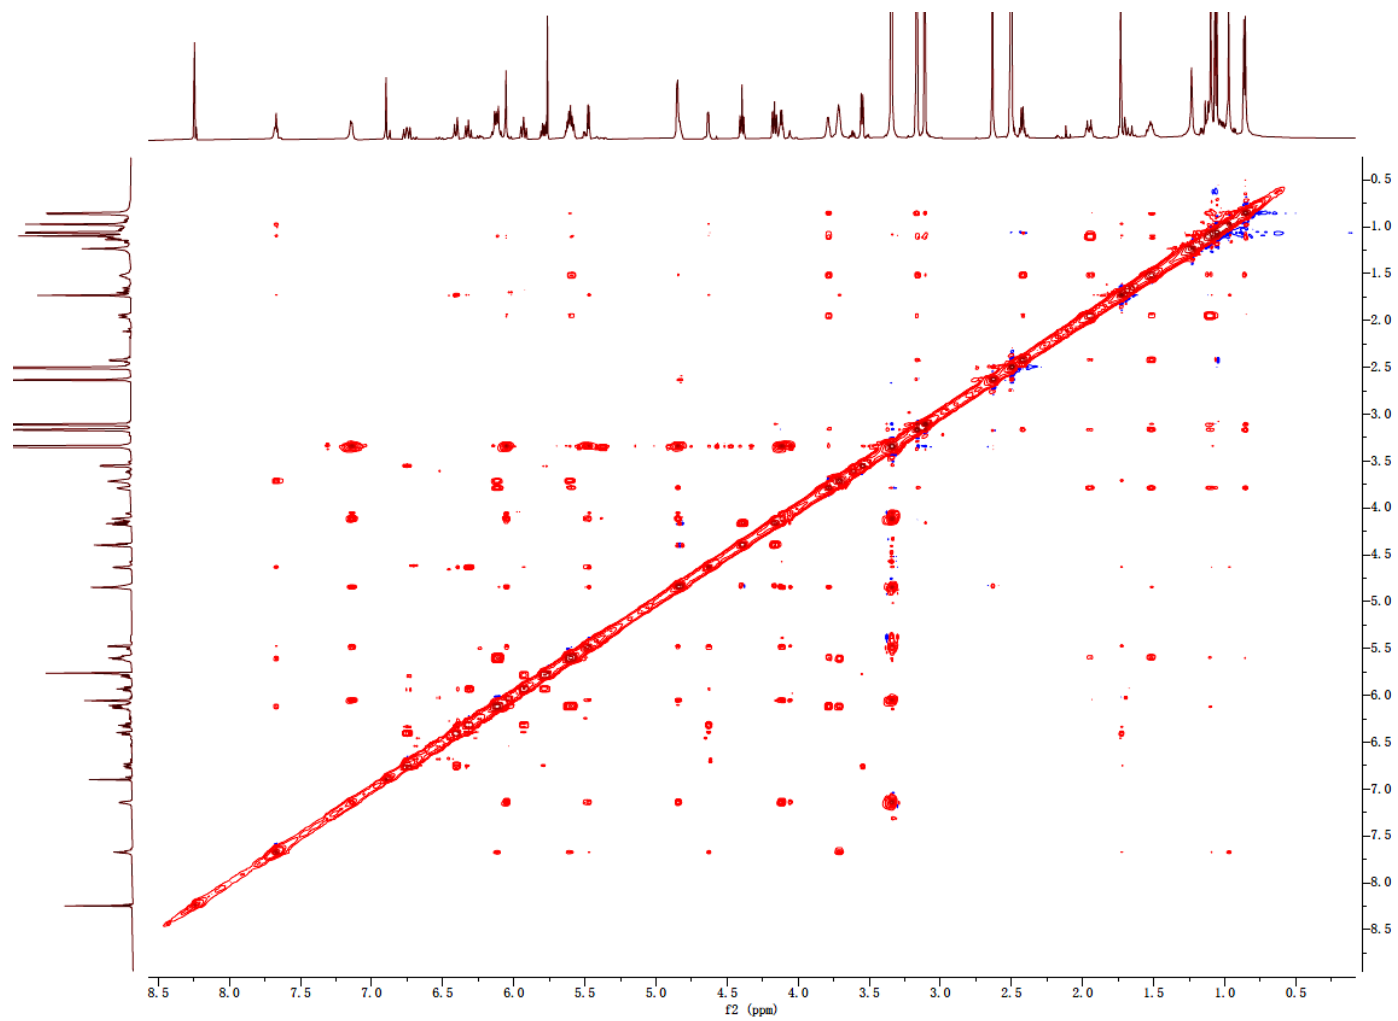

Figure S14. NOESY spectrum of the new compound **2**

### User Spectra

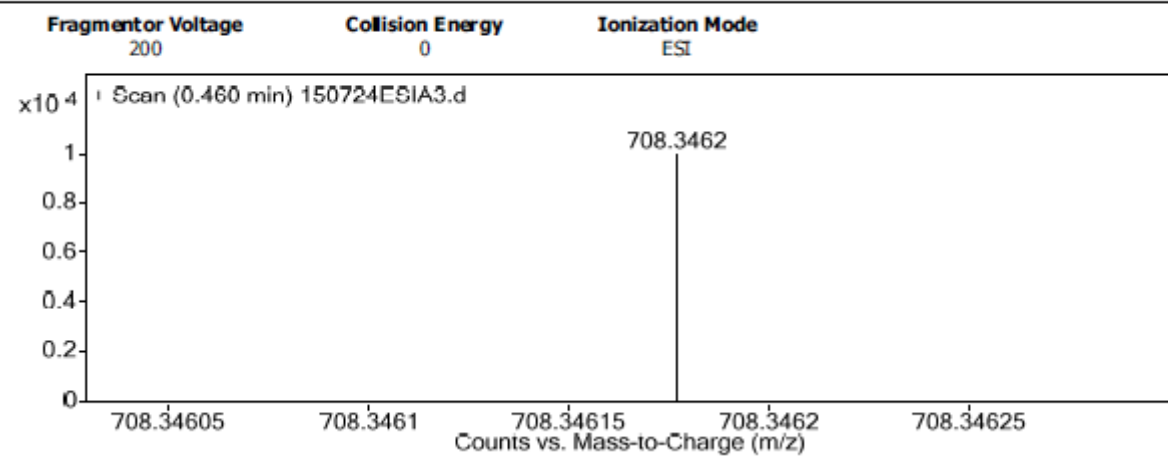

Figure S15. HRESIMS spectrum of the new compound **3**

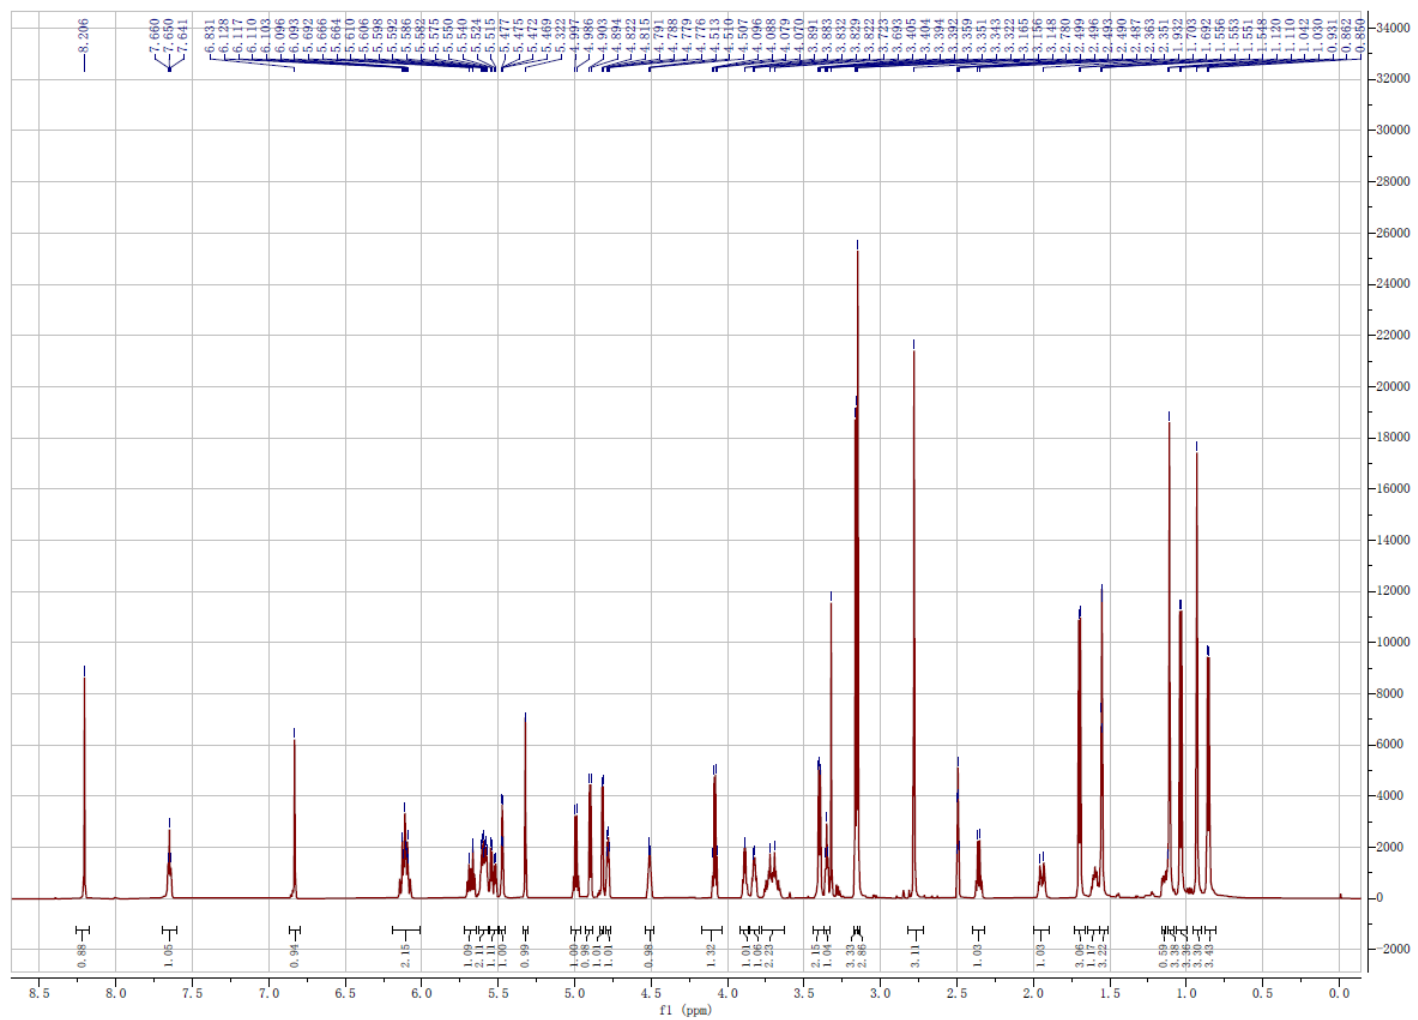

Figure S16.  $^1\text{H}$  NMR (600 MHz,  $\text{DMSO-}d_6$ ) spectrum of the new compound **3**

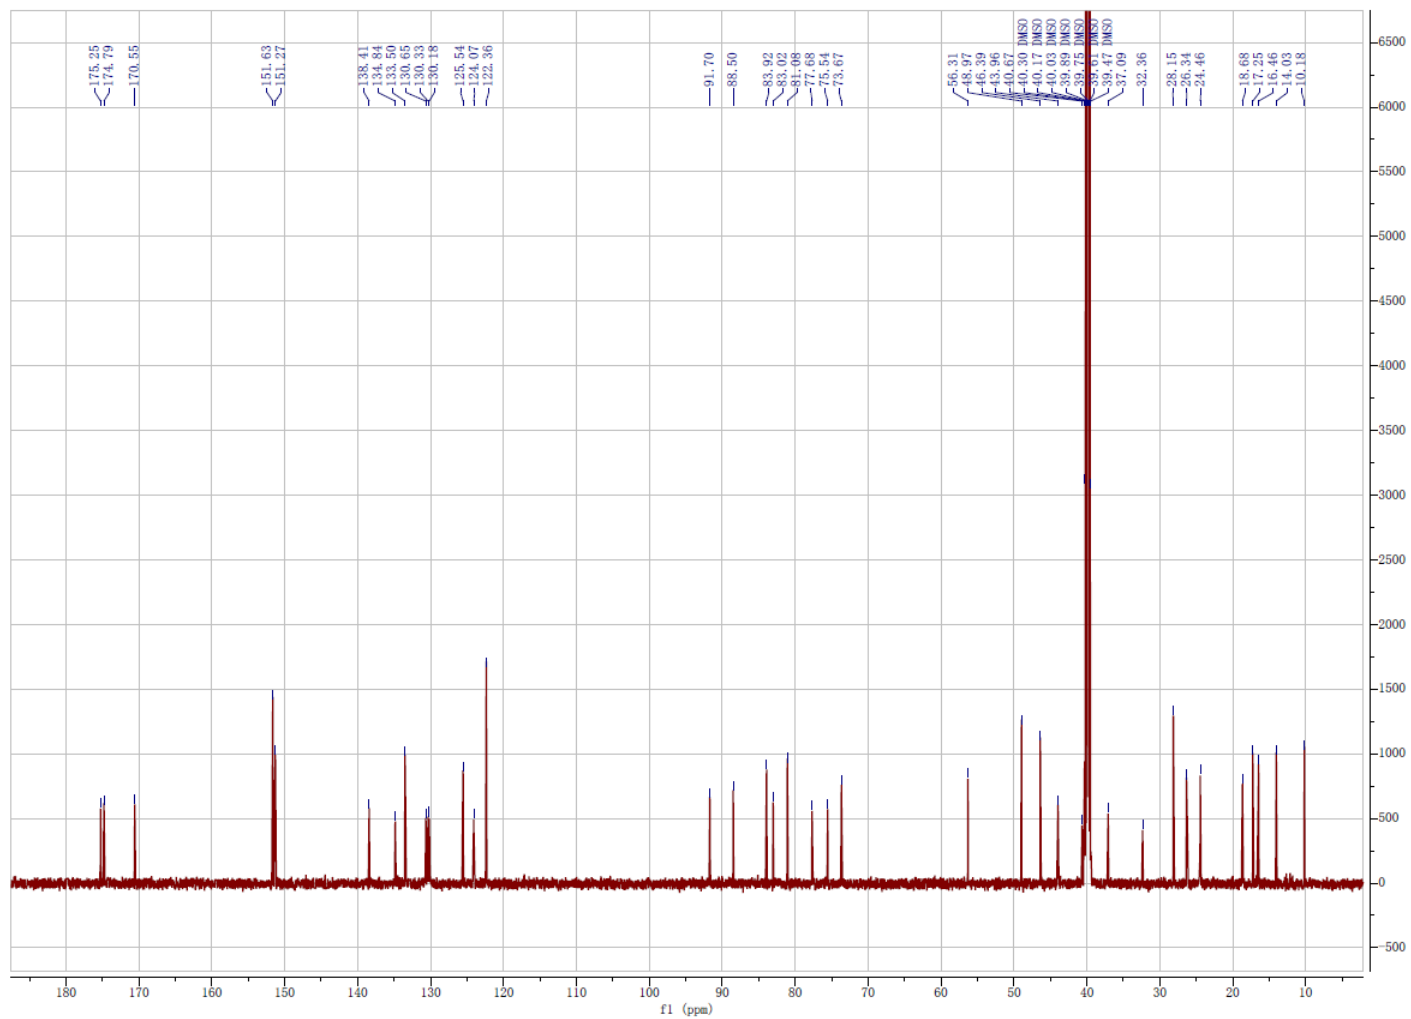

Figure S17.  $^{13}\text{C}$  NMR (150 MHz,  $\text{DMSO-}d_6$ ) spectrum of the new compound **3**

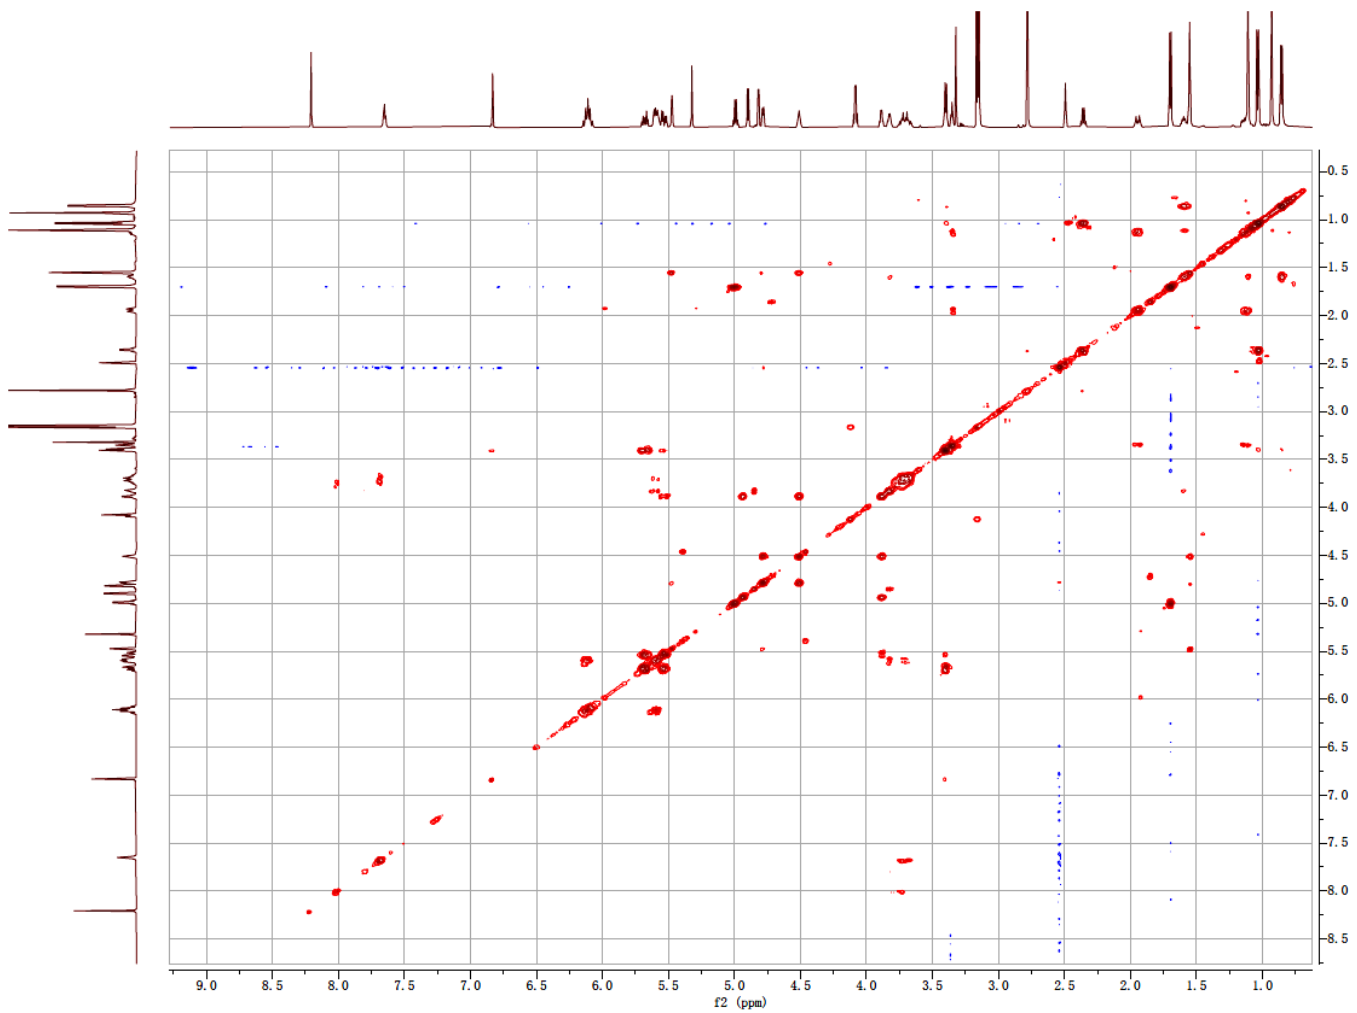

Figure S18. COSY spectrum of the new compound **3**

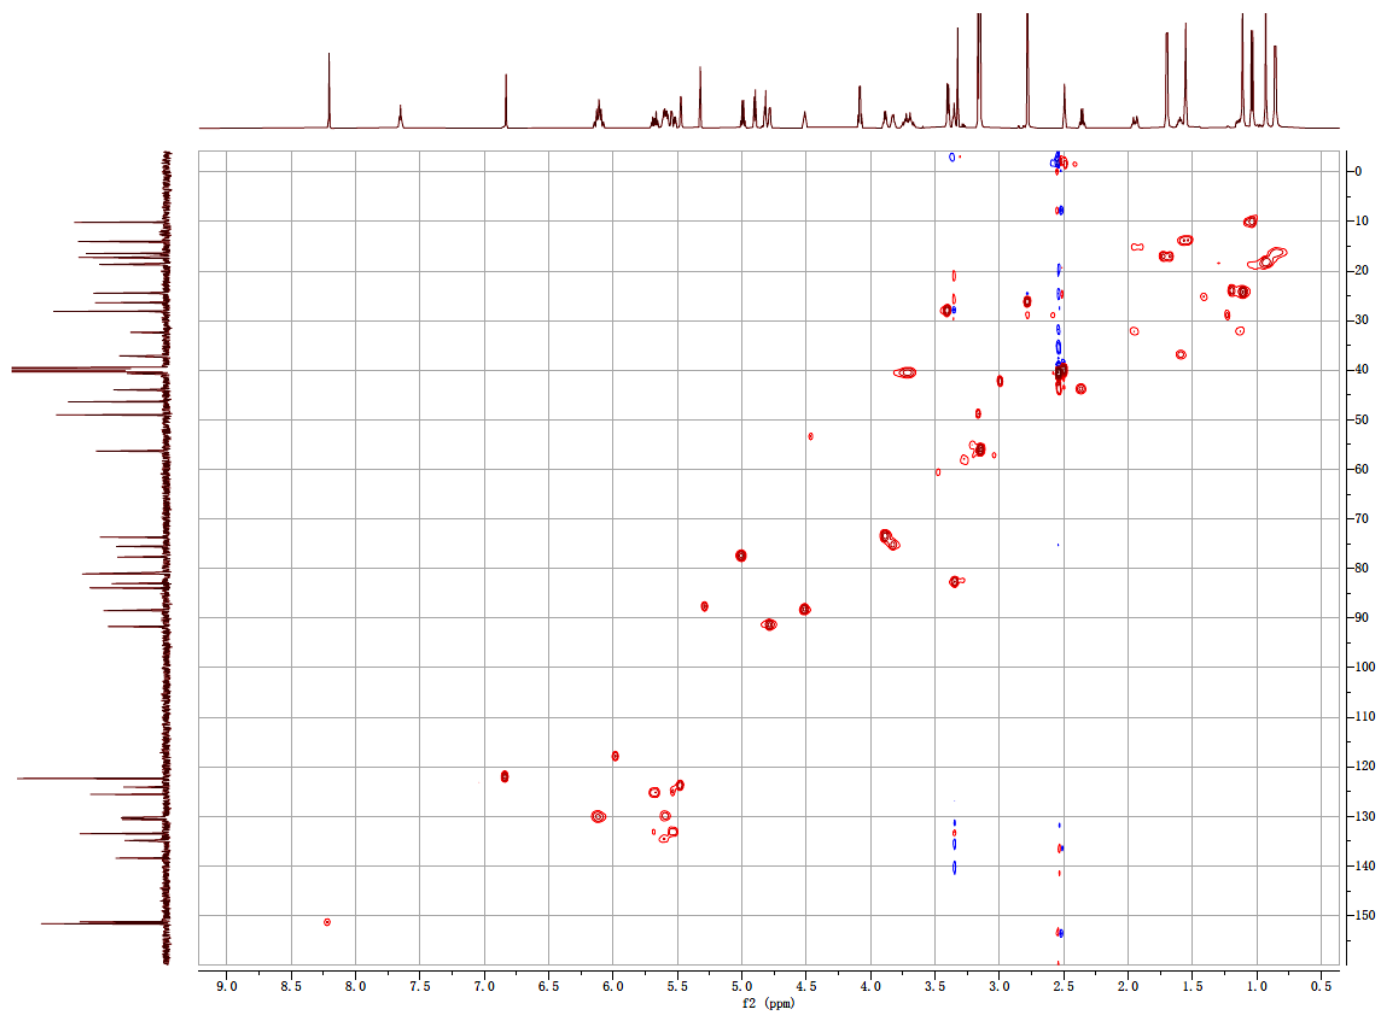

Figure S19. HSQC spectrum of the new compound **3**

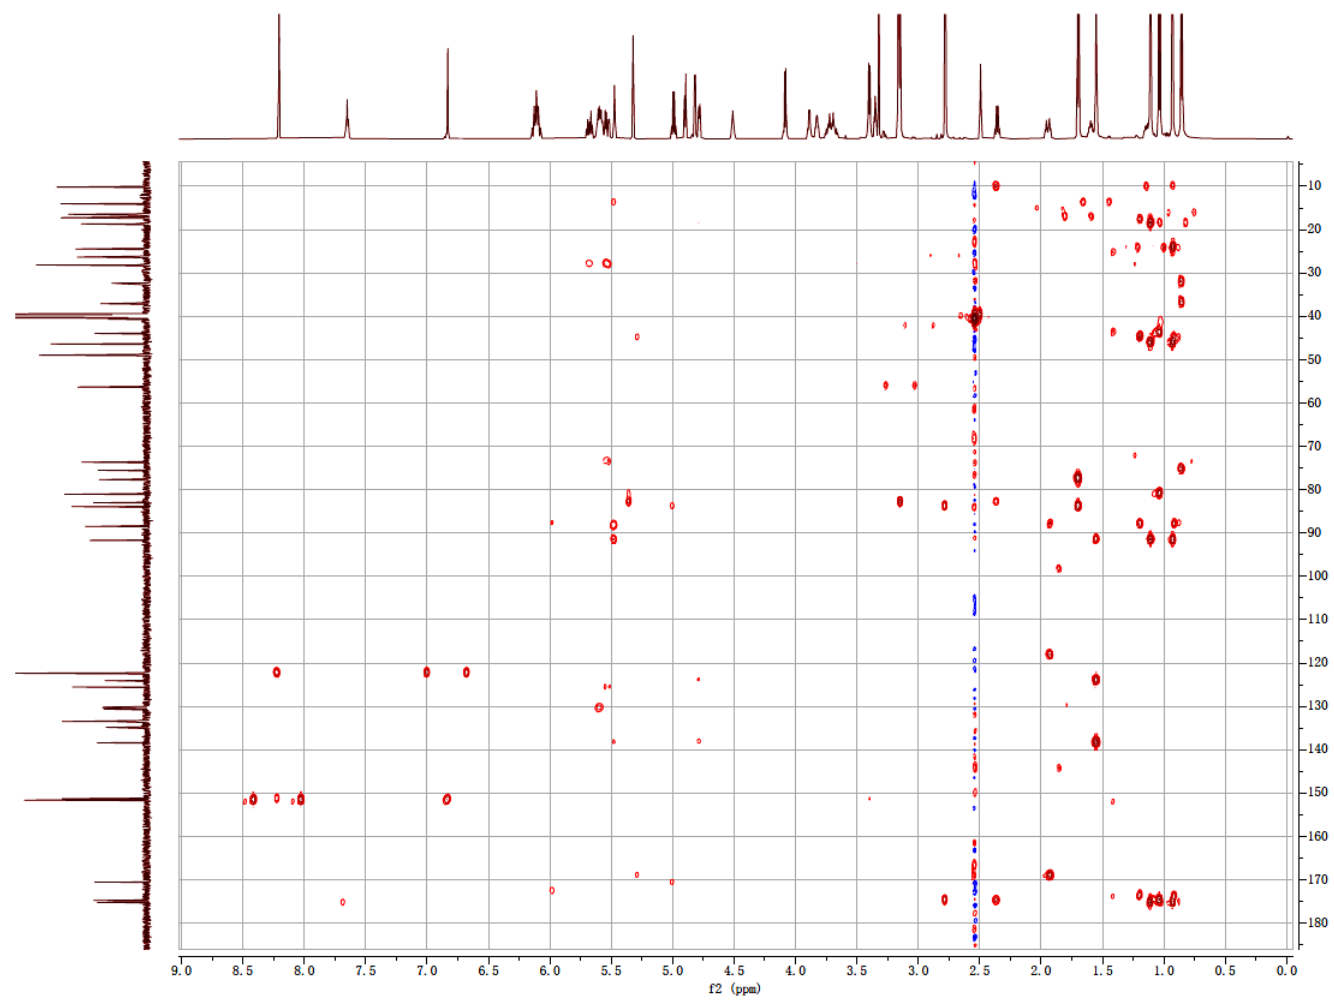

Figure S20. HMBC spectrum of the new compound **3**

## User Spectra

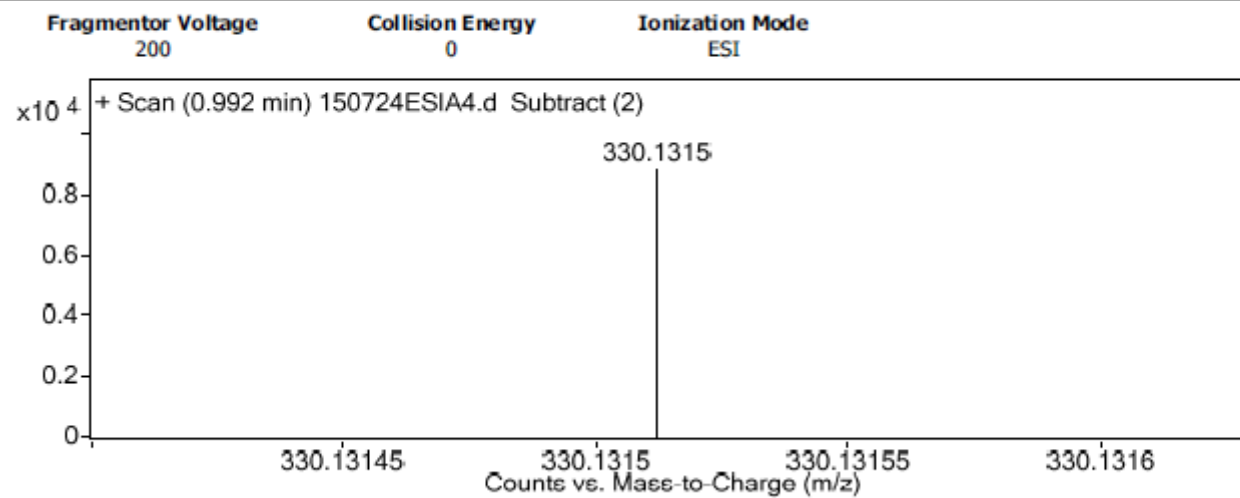

Figure S21. HRESIMS spectrum of the new compound **6**



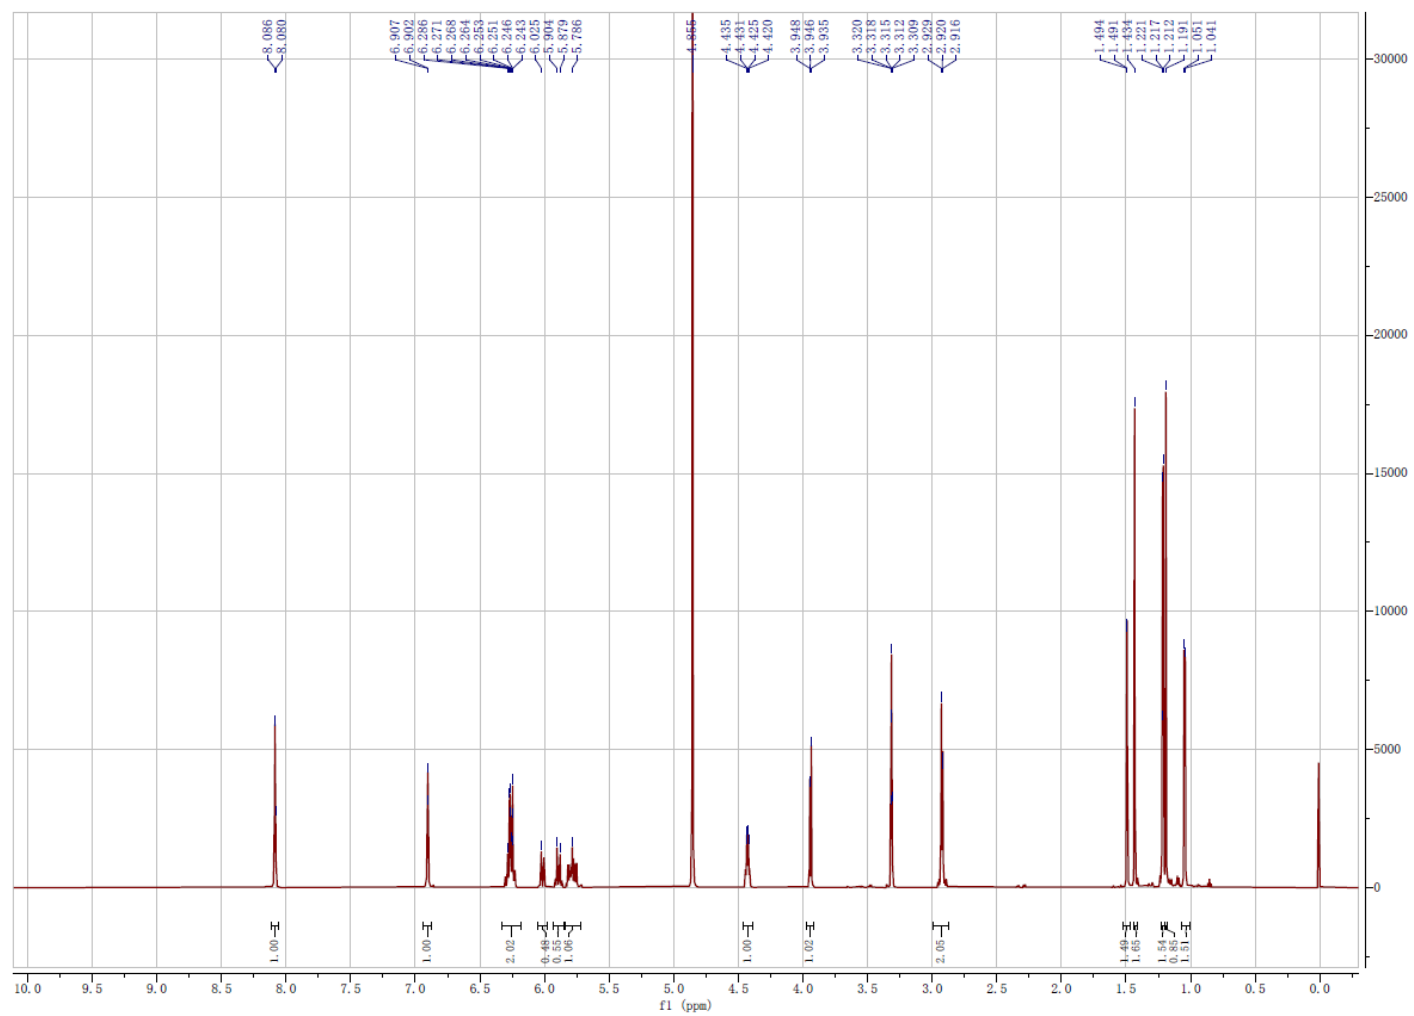

Figure S22.  $^1\text{H}$  NMR (600 MHz,  $\text{CD}_3\text{OD}$ ) spectrum of the new compound **6**

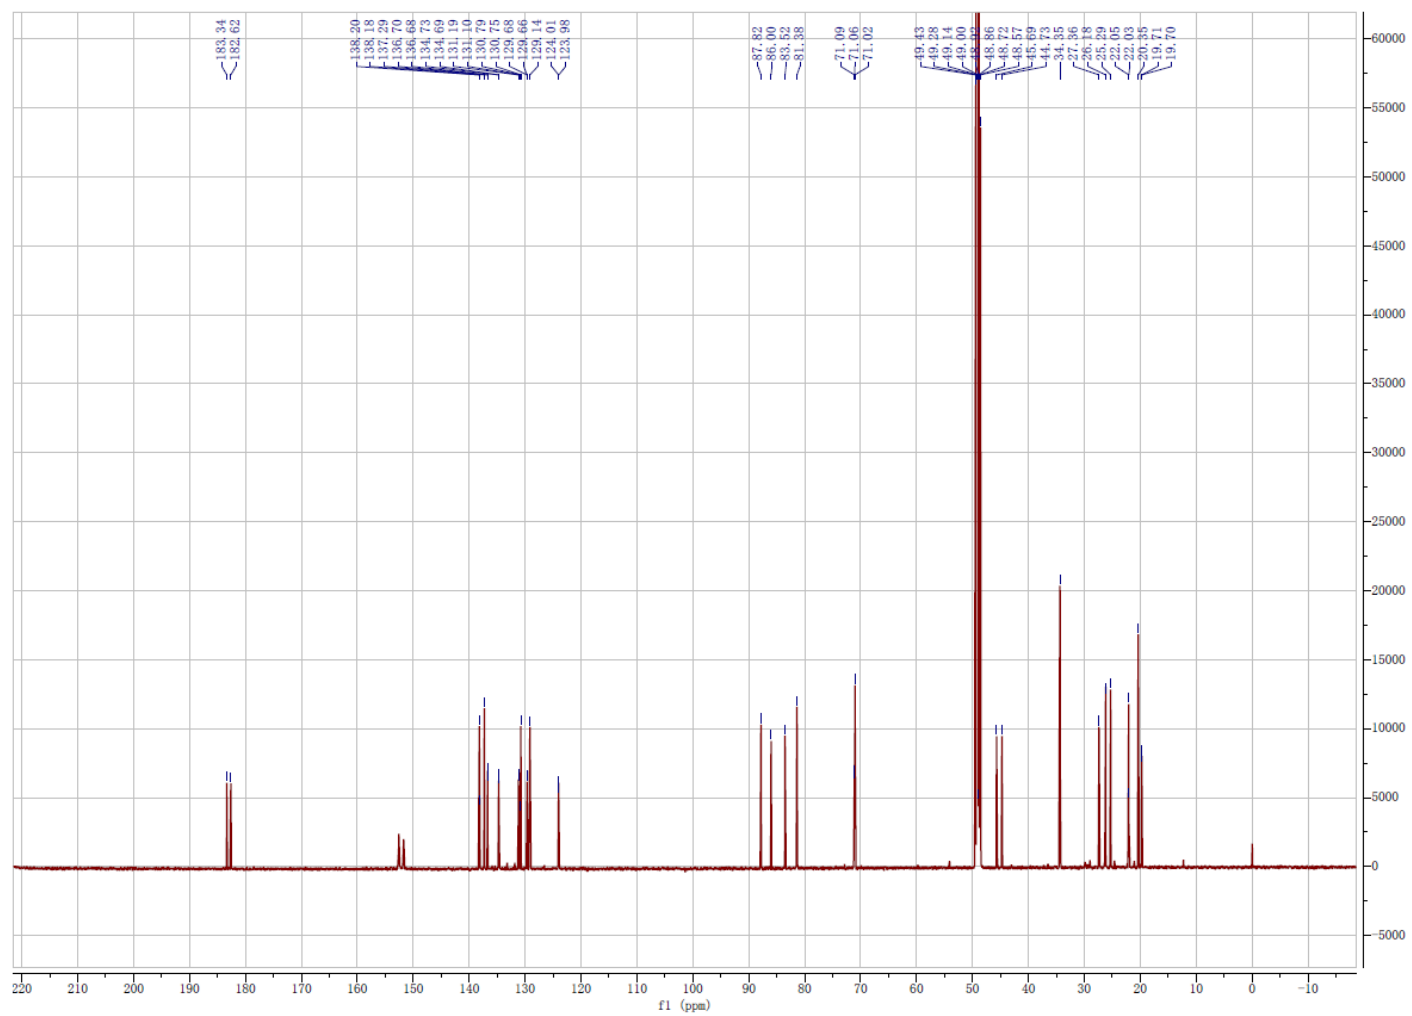

Figure S23. <sup>13</sup>C NMR (150 MHz, CD<sub>3</sub>OD) spectrum of the new compound **6**

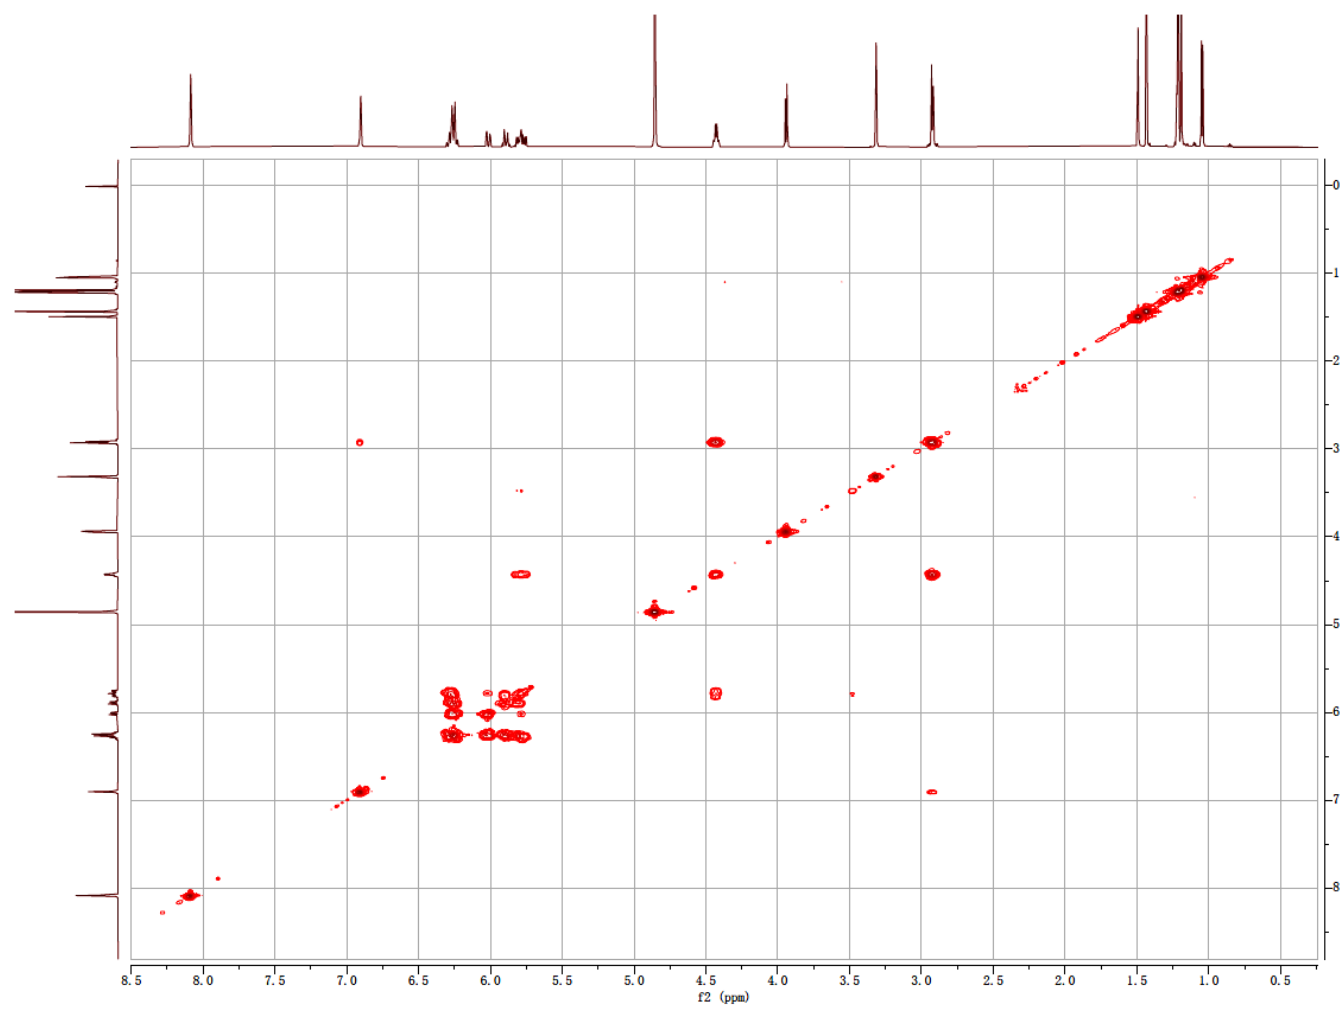

Figure S24. COSY spectrum of the new compound **6**

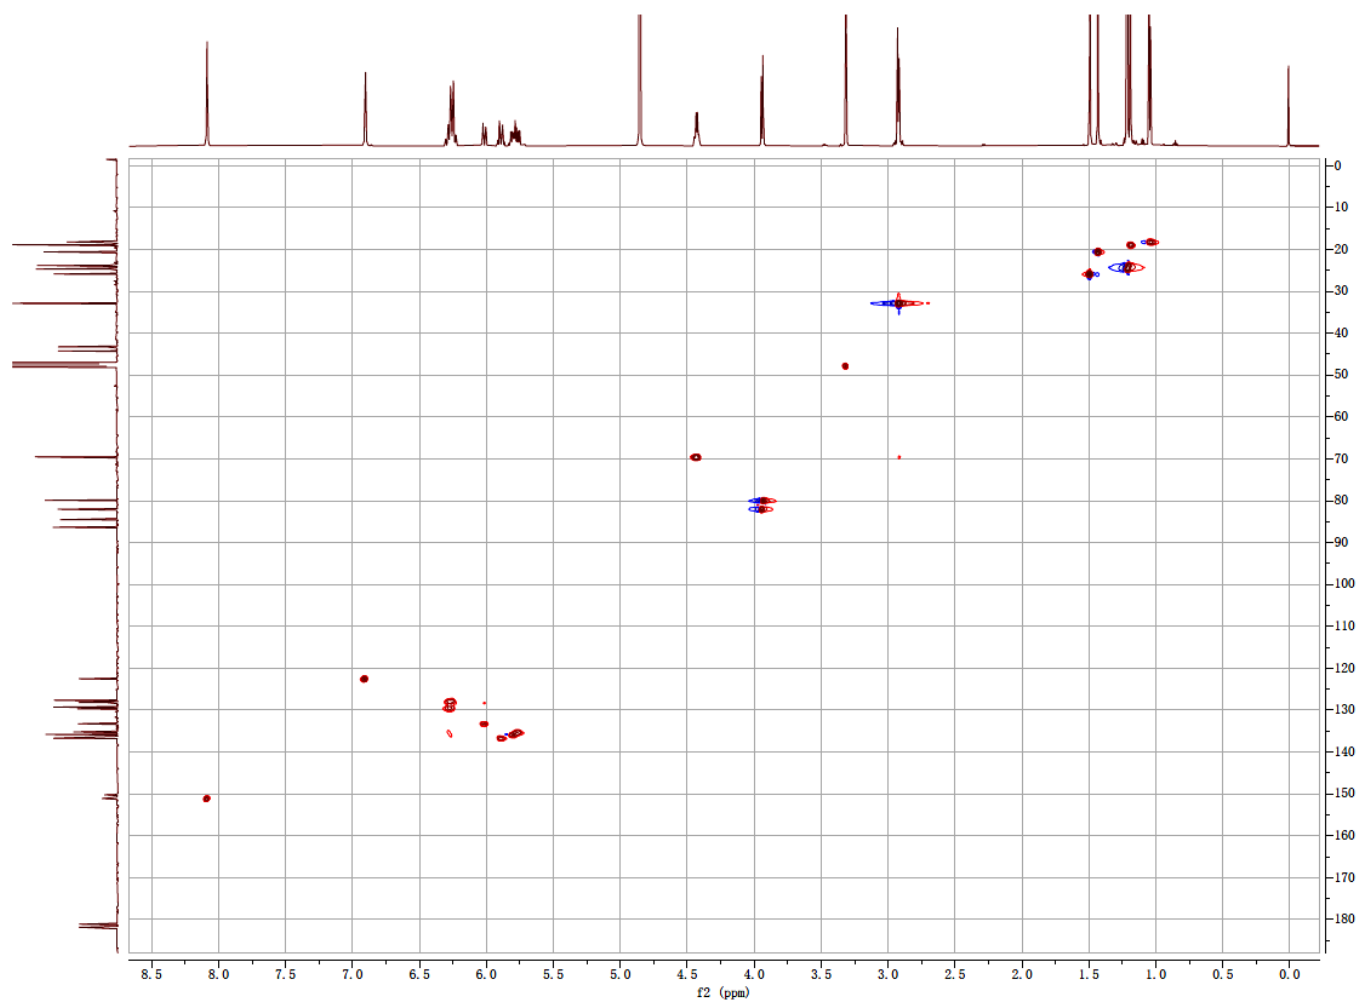

Figure S25. HSQC spectrum of the new compound **6**

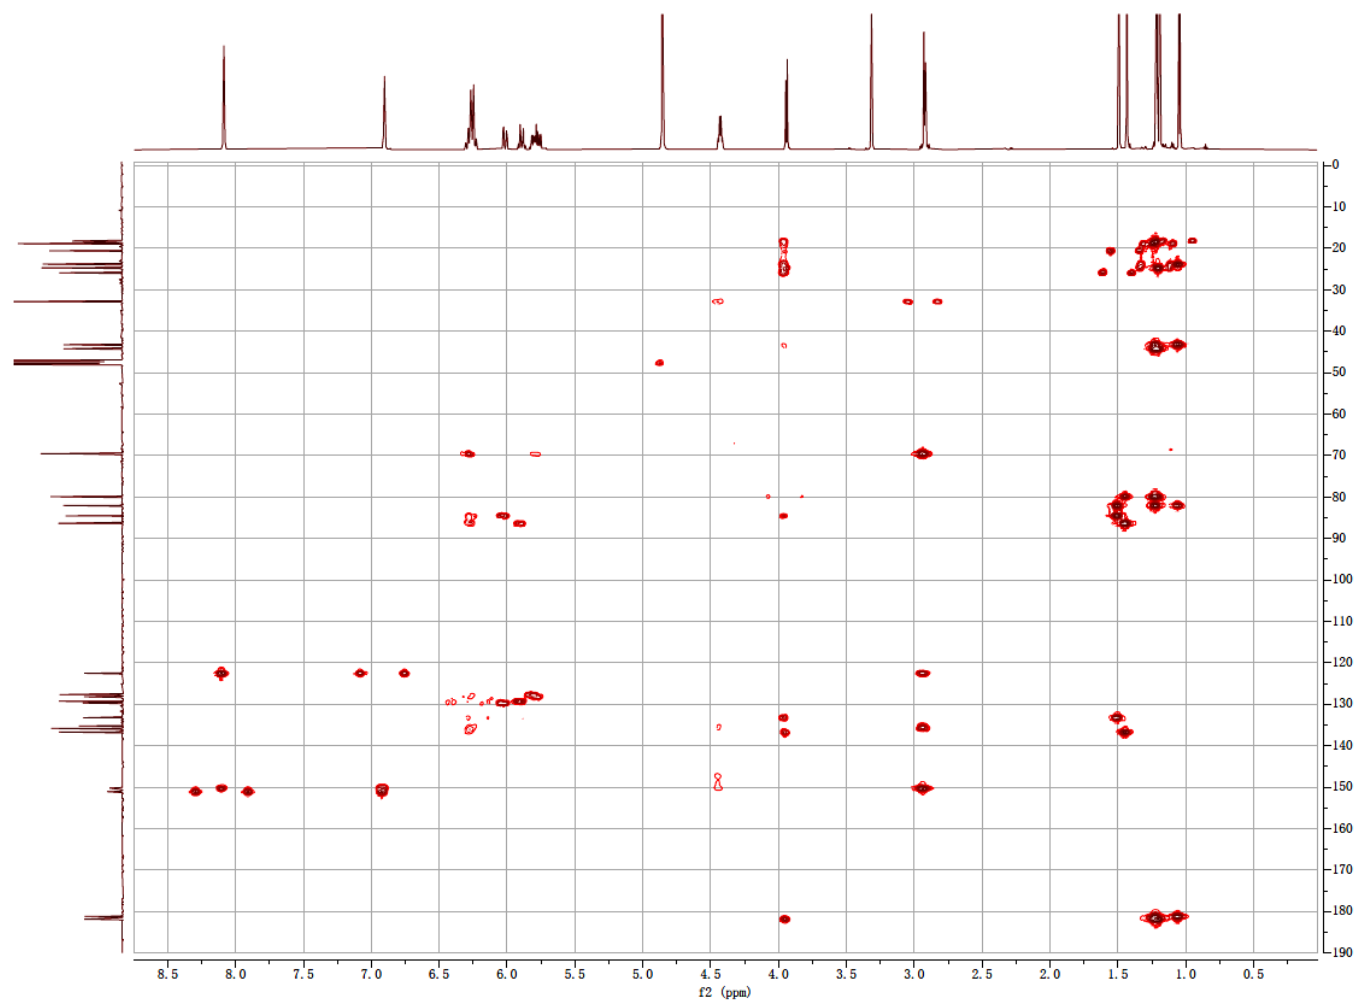

Figure S26. HMBC spectrum of the new compound **6**

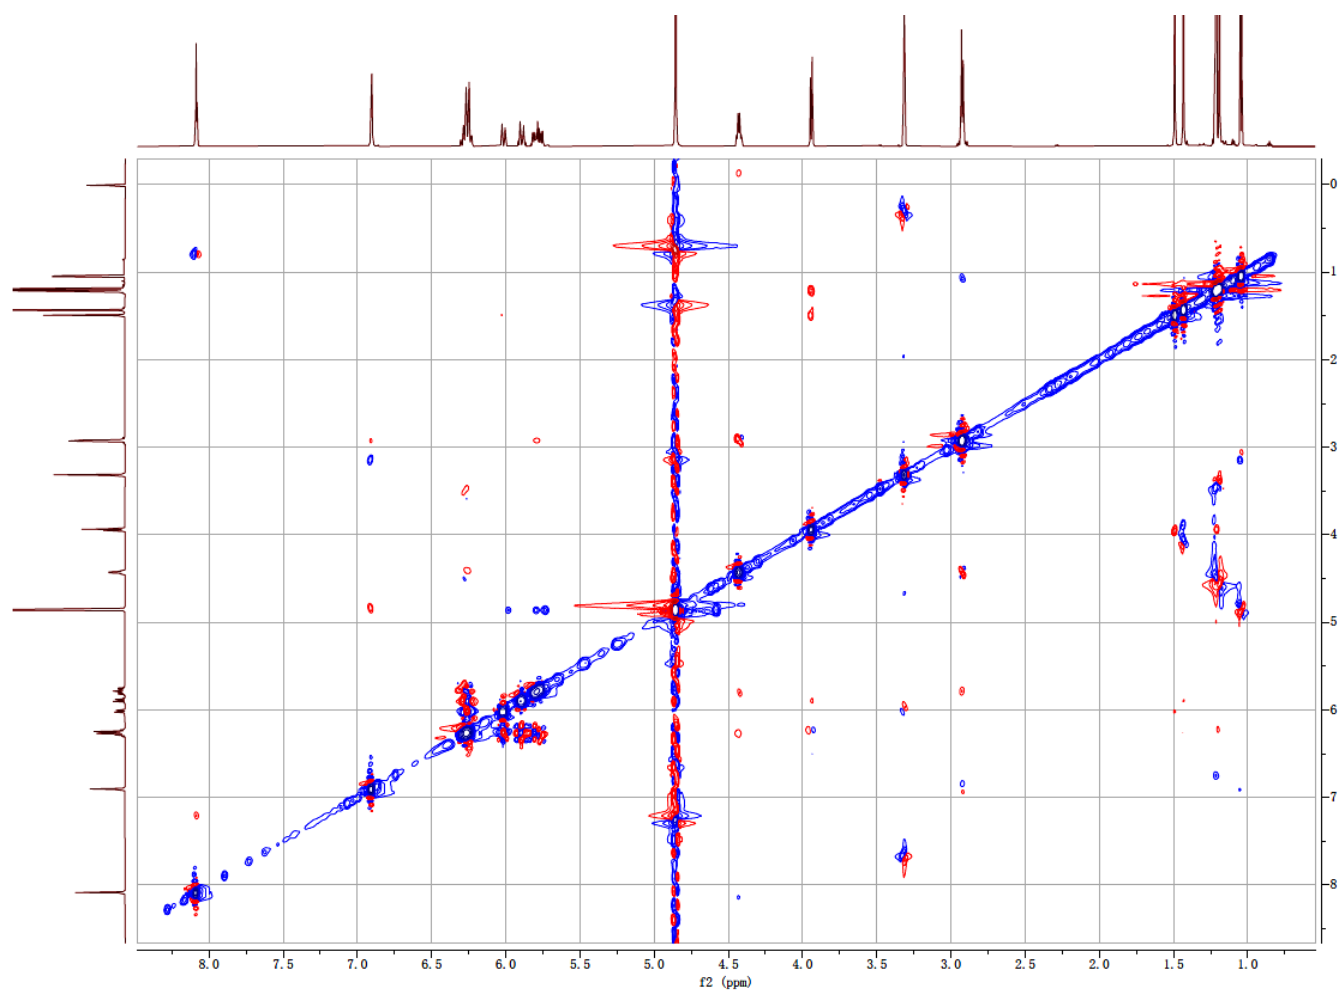

Figure S27. NOESY spectrum of the new compound **6**

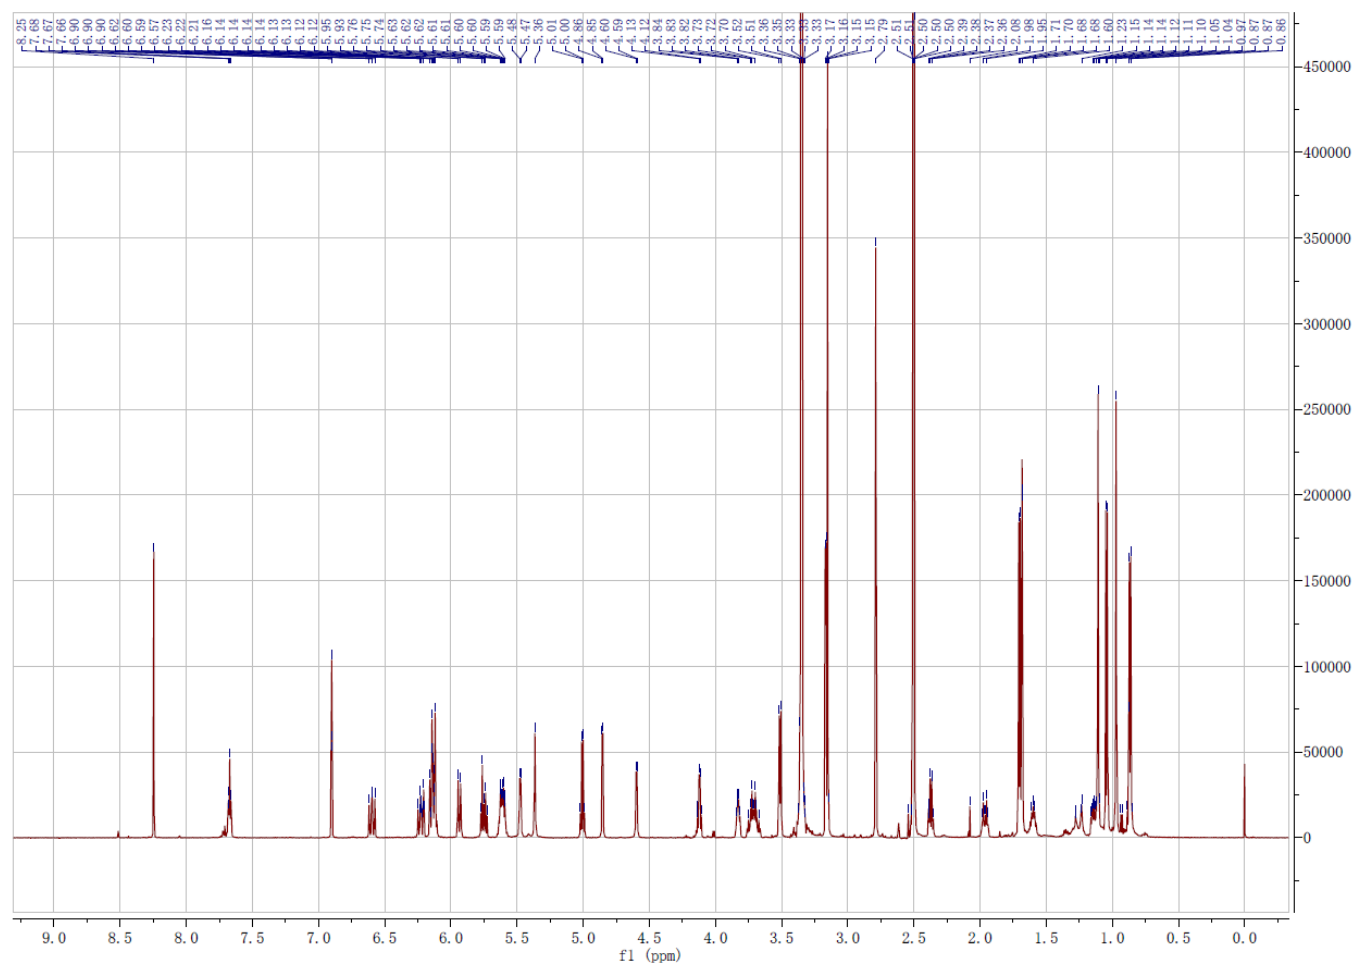

Figure S28.  $^1\text{H}$  NMR (600 MHz,  $\text{DMSO}-d_6$ ) spectrum of the known compound 4

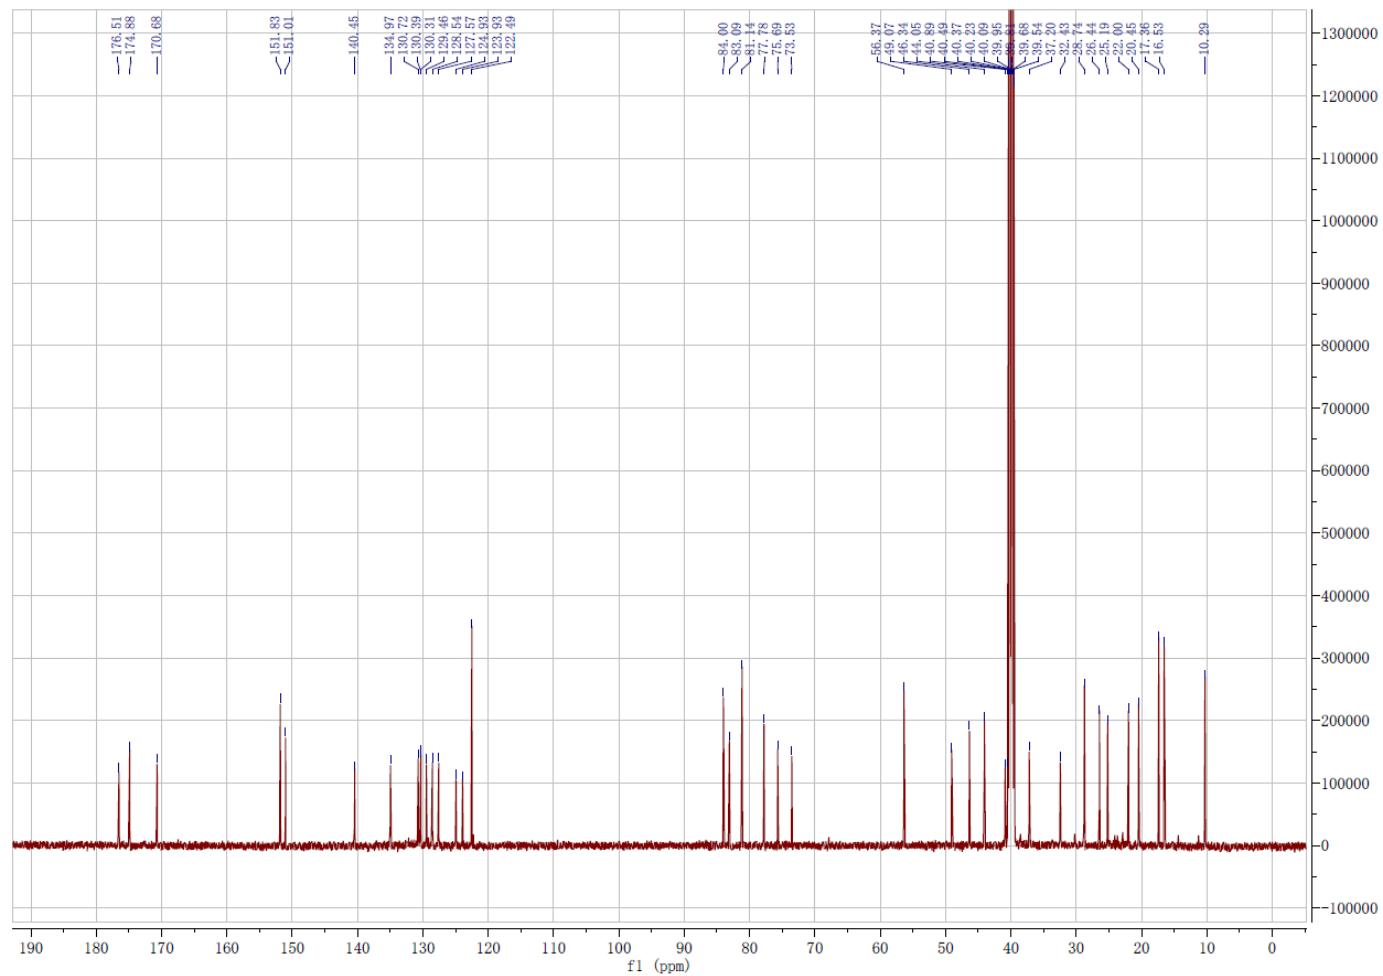

Figure S29. <sup>13</sup>C NMR (150 MHz, DMSO-*d*<sub>6</sub>) spectrum of the known compound **4**



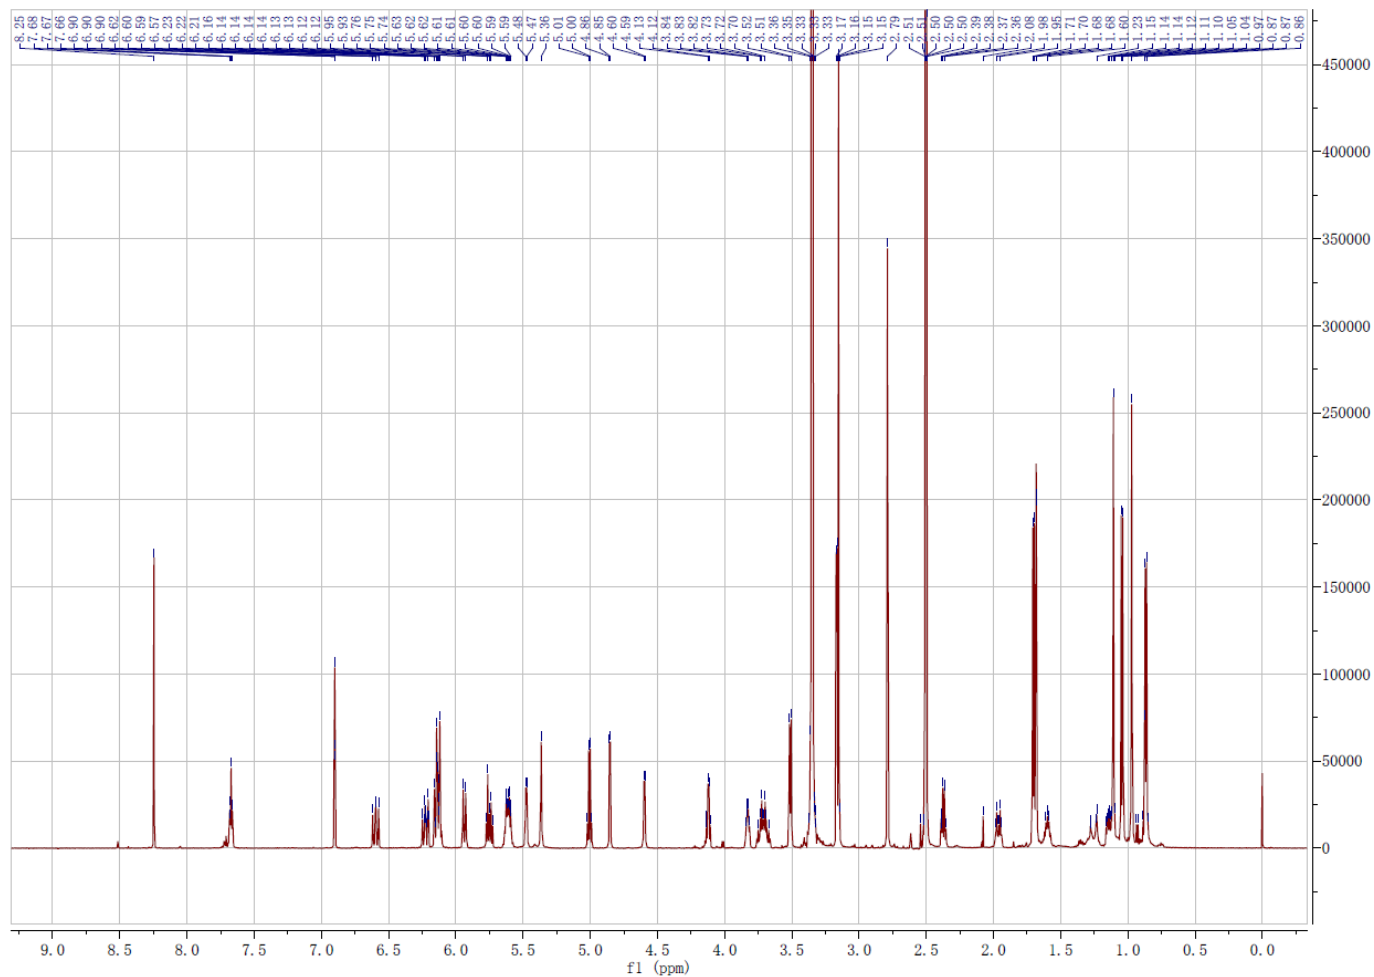

Figure S30.  $^1\text{H}$  NMR (600 MHz,  $\text{DMSO-}d_6$ ) spectrum of the known compound **5**

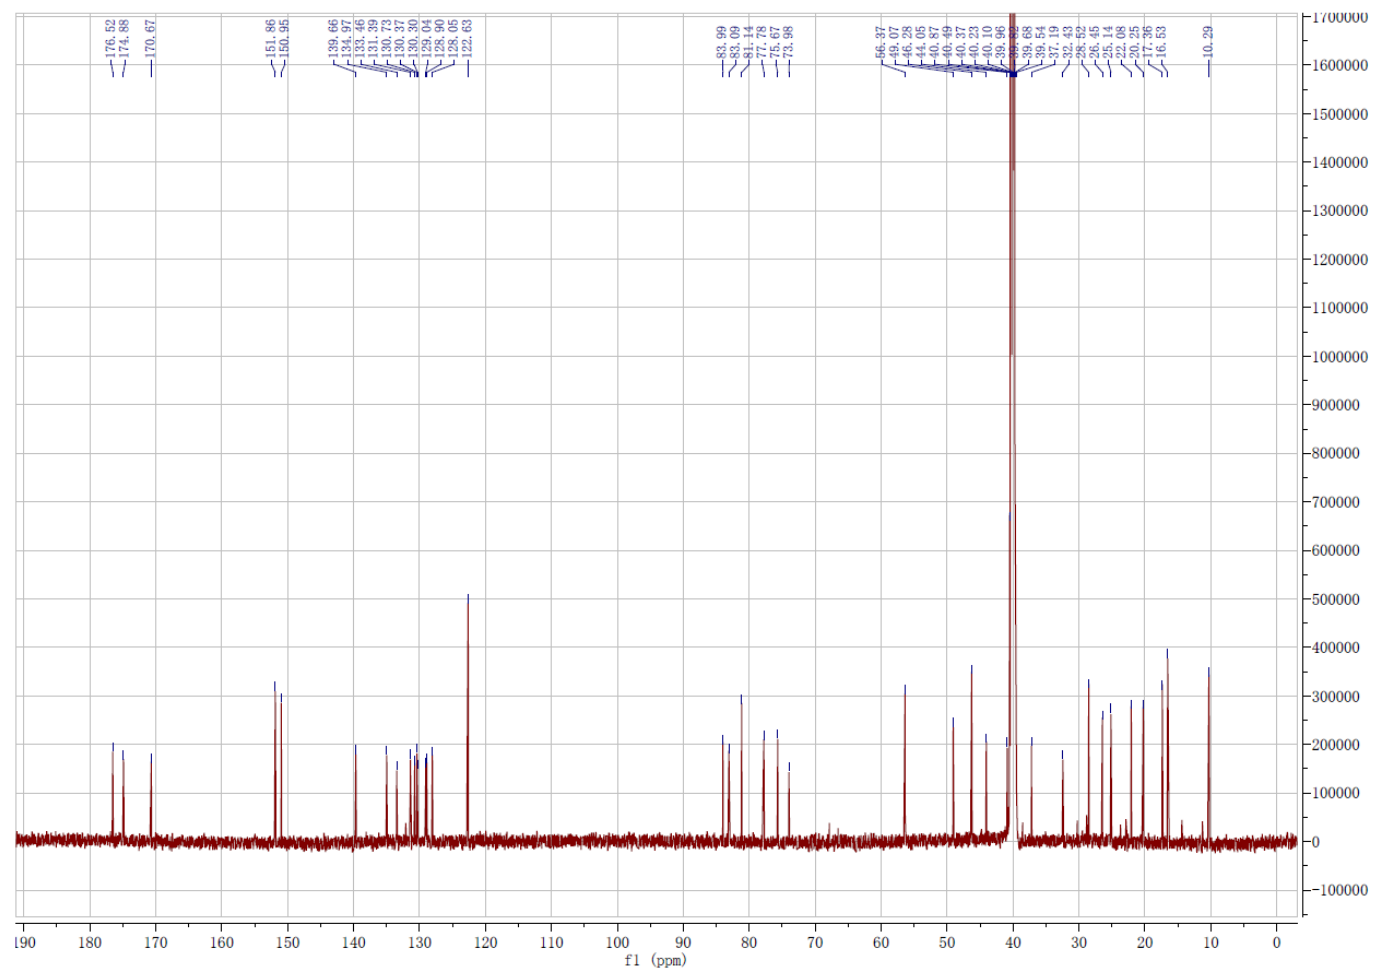

Figure S31. <sup>13</sup>C NMR (150 MHz, DMSO-*d*<sub>6</sub>) spectrum of the known compound **5**
